# Supplementary material
Source: PubMed Central journal article supplement (PMC6391664)

## SUPPLEMENTAL MATERIAL

### Cytogenetic analysis and cohort definitions

Cytogenetic aberrations and composite karyotypes were described according to the International System for Human Cytogenomic Nomenclature 2016 guidelines<sup>1</sup>. Complex karyotype was defined as having 3 or more chromosomal abnormalities in the absence of 1 of the WHO-designated recurring translocations or inversions, that is t(8;21), inv(16) or t(16;16), t(9;11), t(v;11)(v;q23.3), t(6;9), inv(3) or t(3;3) and AML with *BCR-ABL1*<sup>2</sup>. Composite karyotypes with  $\geq$  five cytogenetic aberrations were considered as markers of higher clonal heterogeneity. FISH analyses for *TP53* deletions were performed using the Vysis LSI *TP53/CEP17* probe (#05N56-020, Abbott Molecular).

### *TP53* isoform expression

Isoform expression (GRCh38 v84) was computed using Kallisto v43.0 (PMID 27043002). For each specimen, we either summed up 1/ expression of all isoforms to obtain gene expression values, 2/ isoforms encoding full-length or delta 40 p53 protein isoforms (ENST00000413465.6, ENST00000359597.8, ENST00000455263.6, ENST00000420246.6, ENST00000617185.4, ENST00000269305.8, ENST00000445888.6, ENST00000615910.4, ENST00000622645.4, ENST00000620739.4, ENST00000610538.4, ENST00000619485.4, ENST00000610292.4), 3/ isoforms encoding delta 133 or delta 160 p53 (ENST00000618944.4, ENST00000619186.4, ENST00000504290.5, ENST00000610623.4, ENST00000510385.5, ENST00000504937.5), or 4/ non-coding isoforms (containing retained introns, non-sense-mediated decay products, or with incomplete open reading frames; i.e. ENST00000635293.1, ENST00000576024.1, ENST00000509690.5, ENST00000514944.5, ENST00000574684.1, ENST00000505014.5, ENST00000508793.5, ENST00000604348.5, ENST00000503591.1).

### Normal hematopoietic cells

Control cord blood (CB) cells were collected from consenting mothers at the Charles LeMoyné Hospital (Greenfield Park, QC, Canada). Before chemical screening, CD34<sup>+</sup> CB cells were isolated using the EasySep kit (StemCell Technologies) and cultivated for 6 days in UM171-supplemented media as described previously<sup>3</sup>. CB cells were screened in StemSpan-ACF (StemCell Technologies 09855) containing 100ng/mL SCF, 100ng/mL TPO, 50ng/mL FLT3-L, 1X GlutaMax, 10 $\mu$ g/mL LDL, 500 nM SR1 and 35 nM UM171. Human CD34<sup>+</sup> control mobilized peripheral blood (mpB) from a single healthy donor were isolated by CD34 positive selection using Clinimacs<sup>TM</sup> (Miltenyi). These mpB CD34<sup>+</sup> cells were cultured in the same conditions as the CB CD34<sup>+</sup> cells, with addition of 50 ng/mL Interleukin-6.

### *In vivo* experimentation

All animal procedures complied with recommendations of the Canadian Council on Animal Care and were approved by the Deontology Committee on Animal Experimentation at University of Montreal. NSG mice were purchased from Jackson Laboratory and bred in a pathogen-free animal facility. Eight to twelve-week-old female littermates were randomly assigned to experimental groups and transplanted with leukemic cells *via* the tail vein. Complex karyotype *TP53*-null HL-60 cells<sup>4</sup> and the adverse cytogenetic risk/*TP53* mutated human AML specimen 09H046 (also bears monosomy 17 and mutation in *RUNX1*, *DNMT3A*, *TET2*, *BCOR*, *CEBPA*, *CUX1*, *KMT2C*, *KMT2D*, *NF1*, *SMC5*,

*STAG2* and *USP7* genes) were chosen as relevant models. Six days after transplantation, mice were treated with either volasertib (IV, 2 times a week for 4 weeks at 10mg/kg, formulated in HCl and freshly diluted in 0.9% NaCl), or cytarabine (IP for 5 consecutive days at 50mg/kg, freshly diluted in phosphate buffered saline (PBS)). Vehicle treated mice received both PBS (IP) and 0.9% NaCl (IV). Daily monitoring of mice for symptoms of disease (weight loss, ruffled coat, hunched back and reduced motility) determined the end point for each animal. Leukemia development in sacrificed animals was confirmed by detection of high percentages (>70%) of human CD45 positive cells in the bone marrow and/or spleen by flow cytometry analysis.

### **Flow cytometry analyses**

Bone marrow and spleen were collected and/or dissected and made into single cell suspensions for analysis by flow cytometry (BD Canto II cytometer). Percentage of leukemic cell engraftment was assessed using the following antibodies: anti-human CD45 Pacific Blue (BioLegend #304029) and anti-mouse CD45.1 APC-eFluor780 (eBioscience #47-0453-82). Results were analyzed with FlowJo software.

### **Statistical analyses**

Fisher's exact test was used in the analysis of contingency tables. Analysis of differential gene expression was performed using the Wilcoxon rank-sum test and the false discovery rate (FDR) method was applied for global gene analysis as previously described<sup>11</sup>. Differences in response to small molecules between genetic groups were evaluated using a Wilcoxon rank-sum test performed on IC<sub>50</sub> values in R version 3.1.2. Clustering was performed in python 3.6.2 using the Seaborn library.

1. An International System for Human Cytogenomic Nomenclature (2016) Reprint of: Cytogenetic and Genome Research Vol. 149; 2016.
2. Dohner H, Estey E, Grimwade D, et al. Diagnosis and management of AML in adults: 2017 ELN recommendations from an international expert panel. *Blood*. 2017;129(4):424-447.
3. Fares I, Chagraoui J, Gareau Y, et al. Cord blood expansion. Pyrimidoindole derivatives are agonists of human hematopoietic stem cell self-renewal. *Science*. 2014;345(6203):1509-1512.
4. Liang JC, Ning Y, Wang RY, et al. Spectral karyotypic study of the HL-60 cell line: detection of complex rearrangements involving chromosomes 5, 7, and 16 and delineation of critical region of deletion on 5q31.1. *Cancer Genet Cytogenet*. 1999;113(2):105-109.

## **SUPPLEMENTAL TABLES**

### **Table S1**

Genes included in the mutational analysis

### **Table S2**

*TP53* mutations in complex karyotype AML

### **Table S3**

Mutations identified in complex karyotype AML

### **Table S4**

Association between complex karyotype AML and mutations

### **Table S5**

Compounds included in the preliminary screen

### **Table S6**

Samples included in the preliminary screen

### **Table S7**

Drug responses in the preliminary screen

### **Table S8**

Samples included in the validation screen

### **Table S9**

Drug responses in the validation screen

### **Table S10**

Gene correlation in AML using MiSTIC

### **Table S11**

Genes included in hallmark G2M checkpoint

### **Table S12**

Gene set enrichment analysis (GSEA) in CK AML

**TABLE S1**

| Type        | Gene                                 |
|-------------|--------------------------------------|
| Mutation    | <i>APC</i>                           |
| Mutation    | <i>ARID1A</i>                        |
| Mutation    | <i>ASXL1</i>                         |
| Mutation    | <i>ASXL2</i>                         |
| Mutation    | <i>ATRX</i>                          |
| Mutation    | <i>BCOR</i>                          |
| Mutation    | <i>BCORL1</i>                        |
| Mutation    | <i>BIRC3</i>                         |
| Mutation    | <i>BRAF</i>                          |
| Mutation    | <i>CALR</i>                          |
| Fusion gene | <i>CBFB-MYH11</i>                    |
| Mutation    | <i>CBL</i>                           |
| Mutation    | <i>CBLB</i>                          |
| Mutation    | <i>CBLC</i>                          |
| Mutation    | <i>CDKN2A</i>                        |
| Mutation    | <i>CEBPA</i>                         |
| Mutation    | <i>CEBPB</i>                         |
| Mutation    | <i>CEBPD</i>                         |
| Mutation    | <i>CEBPE</i>                         |
| Mutation    | <i>CEBPG</i>                         |
| Mutation    | <i>CEBPZ</i>                         |
| Mutation    | <i>CREBBP</i>                        |
| Mutation    | <i>CSF3R</i>                         |
| Mutation    | <i>CTNNA1</i>                        |
| Mutation    | <i>CUX1</i>                          |
| Mutation    | <i>DDX41</i>                         |
| Mutation    | <i>DNMT3A</i>                        |
| Mutation    | <i>EED</i>                           |
| Mutation    | <i>EP300</i>                         |
| Mutation    | <i>ETV6</i>                          |
| Fusion gene | <i>EVI1</i> (several rearrangements) |
| Mutation    | <i>EZH2</i>                          |
| Mutation    | <i>FBXW7</i>                         |

|             |                                     |
|-------------|-------------------------------------|
| Mutation    | <i>FLT3</i>                         |
| Mutation    | <i>GATA1</i>                        |
| Mutation    | <i>GATA2</i>                        |
| Mutation    | <i>GNAS</i>                         |
| Mutation    | <i>H3F3A</i>                        |
| Mutation    | <i>HIST1H3F</i>                     |
| Mutation    | <i>HIST1H3H</i>                     |
| Mutation    | <i>HRAS</i>                         |
| Mutation    | <i>IDH1</i>                         |
| Mutation    | <i>IDH2</i>                         |
| Mutation    | <i>IKZF1</i>                        |
| Mutation    | <i>IRF1</i>                         |
| Mutation    | <i>JAK1</i>                         |
| Mutation    | <i>JAK2</i>                         |
| Mutation    | <i>JAK3</i>                         |
| Mutation    | <i>KDM6A</i>                        |
| Mutation    | <i>KIT</i>                          |
| Mutation    | <i>KMT2A</i>                        |
| Mutation    | <i>KMT2B</i>                        |
| Mutation    | <i>KMT2C</i>                        |
| Mutation    | <i>KMT2D</i>                        |
| Mutation    | <i>KRAS</i>                         |
| Fusion gene | <i>MLL</i> (several rearrangements) |
| Fusion gene | <i>ML-RARA</i>                      |
| Mutation    | <i>MPL</i>                          |
| Mutation    | <i>MYC</i>                          |
| Mutation    | <i>MYD88</i>                        |
| Mutation    | <i>NF1</i>                          |
| Mutation    | <i>NOTCH1</i>                       |
| Mutation    | <i>NPM1</i>                         |
| Mutation    | <i>NRAS</i>                         |
| Fusion gene | <i>NUP98-NSD1</i>                   |
| Mutation    | <i>PHF6</i>                         |
| Mutation    | <i>PTEN</i>                         |
| Mutation    | <i>PTPN11</i>                       |

|             |                      |
|-------------|----------------------|
| Mutation    | <i>RAD21</i>         |
| Mutation    | <i>RHOA</i>          |
| Mutation    | <i>RUNX1</i>         |
| Fusion gene | <i>RUNX1-RUNX1T1</i> |
| Mutation    | <i>SETBP1</i>        |
| Mutation    | <i>SETD2</i>         |
| Mutation    | <i>SF3B1</i>         |
| Mutation    | <i>SH2B3</i>         |
| Mutation    | <i>SMARCA4</i>       |
| Mutation    | <i>SMC1A</i>         |
| Mutation    | <i>SMC3</i>          |
| Mutation    | <i>SMC5</i>          |
| Mutation    | <i>SPI1</i>          |
| Mutation    | <i>SRSF2</i>         |
| Mutation    | <i>STAG1</i>         |
| Mutation    | <i>STAG2</i>         |
| Mutation    | <i>STAT3</i>         |
| Mutation    | <i>STAT5A</i>        |
| Mutation    | <i>STAT5B</i>        |
| Mutation    | <i>SUZ12</i>         |
| Mutation    | <i>TET2</i>          |
| Mutation    | <i>TP53</i>          |
| Mutation    | <i>U2AF1</i>         |
| Mutation    | <i>USP7</i>          |
| Mutation    | <i>WHSC1</i>         |
| Mutation    | <i>WT1</i>           |
| Mutation    | <i>ZBTB7A</i>        |
| Mutation    | <i>ZMYM3</i>         |
| Mutation    | <i>ZRSR2</i>         |



|        |   |       |               |        |       |               |          |
|--------|---|-------|---------------|--------|-------|---------------|----------|
| 11H145 | 1 | G245D | chr17:7577547 | 0.961  | .     | .             | positive |
| 11H170 | 0 | .     | .             | .      | .     | .             | negative |
| 11H175 | 0 | .     | .             | .      | .     | .             | negative |
| 11H177 | 1 | V216G | chr17:7578202 | 0.9351 | .     | .             | positive |
| 11H187 | 1 | E349- | chr17:7573979 | 0.7601 | Q136* | chr17:7578524 | 0.1265   |
| 12H012 | 1 | C135R | chr17:7578527 | 0.9718 | .     | .             | negative |
| 12H055 | 0 | .     | .             | .      | .     | .             | negative |
| 12H058 | 1 | R248W | chr17:7577539 | 0.9459 | .     | .             | positive |
| 12H067 | 1 | H179Y | chr17:7578395 | 0.9931 | .     | .             | negative |
| 12H096 | 0 | .     | .             | .      | .     | .             | negative |
| 12H106 | 1 | Y234C | chr17:7577580 | 0.9911 | .     | .             | positive |
| 12H117 | 1 | R248Q | chr17:7577538 | 1      | .     | .             | negative |
| 12H138 | 0 | .     | .             | .      | .     | .             | negative |
| 12H149 | 0 | .     | .             | .      | .     | .             | negative |
| 12H170 | 1 | C124- | chr17:7579316 | .      | .     | .             | positive |
| 13H018 | 1 | I195T | chr17:7578265 | 0.8573 | .     | .             | positive |
| 13H056 | 1 | V272M | chr17:7577124 | 0.3022 | .     | .             | negative |
| 13H141 | 1 | K132- | chr17:7578535 | 0.98   | .     | .             | positive |
| 13H150 | 0 | .     | .             | .      | .     | .             | negative |



**TABLE S3**

| gene   | sample | mutation     | position        | VAF    | transcript   | method |
|--------|--------|--------------|-----------------|--------|--------------|--------|
| ASXL1  | 10H113 | G643fsX      | chr20:31022441  | 0.2439 | NM_015338    | casava |
| ASXL1  | 07H038 | Q708X        | chr20:31022637  | 0.4547 | NM_015338    | kmer   |
| BRAF   | 07H038 | R575K        | chr7:140454004  | 0.4828 | NM_004333    | casava |
| CALR   | 12H138 | L367 (del52) | chr19:13054572  | 0.375  | NM_004343    | kmer   |
| CALR   | 11H044 | L367 (del52) | chr19:13054572  | 0.334  | NM_004343    | kmer   |
| CALR   | 10H130 | L367 (del52) | chr19:13054572  | 0.428  | NM_004343    | kmer   |
| CBL    | 12H058 | C396R        | chr11:119148966 | 0.6871 | NM_005188    | casava |
| CBL    | 02H026 | C416Y        | chr11:119149239 | 0.4242 | NM_005188    | casava |
| CEBPA  | 06H029 | A295T        | chr19:33792438  | 0.5082 | NM_004364    | casava |
| CREBBP | 12H055 | Q1765fsX     | chr16:3779754   | 0.3933 | NM_004380    | casava |
| CSF3R  | 11H175 | Q741X        | chr1:36932248   | 0.5082 | NM_000760    | casava |
| CSF3R  | 12H106 | T618I        | chr1:36933434   | 0.0562 | NM_000760    | kmer   |
| DNMT3A | 09H057 | R882H        | chr2:25457242   | 0.1798 | NM_175629    | kmer   |
| DNMT3A | 06H016 | R882H        | chr2:25457242   | 0.5071 | NM_175629    | kmer   |
| DNMT3A | 03H090 | R882H        | chr2:25457242   | 0.446  | NM_175629    | kmer   |
| DNMT3A | 13H150 | I705T        | chr2:25463568   | 0.4897 | NM_175629    | casava |
| DNMT3A | 10H078 | S669fsX      | chr2:25464505   | 0.3182 | NM_175629    | casava |
| DNMT3A | 12H117 | V665M        | chr2:25464520   | 0.5723 | NM_175629    | casava |
| DNMT3A | 12H170 | L508fsX      | chr2:25468153   | 0.2308 | NM_175629    | casava |
| DNMT3A | 10H014 | R379C        | chr2:25469633   | 0.6222 | NM_175629    | casava |
| EED    | 09H085 | W364C        | chr11:85988147  | 0.4222 | NM_152991    | casava |
| EZH2   | 13H056 | R684C        | chr7:148506462  | 0.768  | NM_004456    | casava |
| EZH2   | 06H029 | L589P        | chr7:148511136  | 0.3521 | NM_004456    | casava |
| FLT3   | 04H132 | D835H        | chr13:28592642  | 0.0813 | NM_004119    | kmer   |
| FLT3   | 06H074 | A680V        | chr13:28602329  | 0.5276 | NM_004119    | casava |
| FLT3   | 10H078 | E596 (ITD)   | chr13:28608268  | 0.5771 | NM_004119    | kmer   |
| FLT3   | 03H090 | S585 (ITD)   | chr13:28608303  | 0.6822 | NM_004119    | kmer   |
| FLT3   | 07H156 | V581 (ITD)   | chr13:28608314  | 0.1105 | NM_004119    | kmer   |
| IDH1   | 11H187 | R132C        | chr2:209113113  | 0.5554 | NM_005896    | kmer   |
| IDH2   | 10H113 | R140Q        | chr15:90631934  | 0.5513 | NM_002168    | kmer   |
| IDH2   | 13H150 | R140Q        | chr15:90631934  | 0.5003 | NM_002168    | kmer   |
| IDH2   | 10H014 | R140Q        | chr15:90631934  | 0.4817 | NM_002168    | kmer   |
| JAK2   | 09H054 | V617F        | chr9:5073770    | 0.7162 | NM_004972    | kmer   |
| JAK2   | 03H030 | V617F        | chr9:5073770    | 0.766  | NM_004972    | kmer   |
| JAK2   | 12H058 | V617F        | chr9:5073770    | 0.5512 | NM_004972    | kmer   |
| JAK2   | 09H085 | V617F        | chr9:5073770    | 0.9849 | NM_004972    | kmer   |
| KMT2A  | 13H141 | PTD          | chr11:118339489 | NA     | NM_001197104 | tophat |
| KMT2A  | 13H150 | PTD          | chr11:118339489 | NA     | NM_001197104 | tophat |
| KMT2A  | 06H016 | PTD          | chr11:118342376 | NA     | NM_001197104 | tophat |
| KMT2A  | 09H045 | PTD          | chr11:118342376 | NA     | NM_001197104 | tophat |
| KMT2A  | 07H034 | R3659Q       | chr11:118380738 | 0.4015 | NM_001197104 | casava |
| KMT2C  | 11H132 | R3995fsX     | chr7:151851507  | 0.2482 | NM_170606    | casava |
| KMT2C  | 12H067 | E1165K       | chr7:151919092  | 0.3261 | NM_170606    | casava |
| KMT2D  | 03H090 | G5075R       | chr12:49420526  | 0.4574 | NM_003482    | casava |
| KRAS   | 11H017 | G12D         | chr12:25398284  | 0.5272 | NM_004985    | kmer   |

|        |        |                   |                 |        |              |        |
|--------|--------|-------------------|-----------------|--------|--------------|--------|
| NF1    | 08H018 | W223R             | chr17:29508740  | 0.2642 | NM_000267    | casava |
| NF1    | 11H145 | T676fsX           | chr17:29553477  | 0.8333 | NM_000267    | casava |
| NF1    | 13H056 | R1748X            | chr17:29654553  | 0.8438 | NM_000267    | casava |
| NF1    | 06H075 | A1852S            | chr17:29657321  | 0.8222 | NM_000267    | casava |
| NF1    | 10H174 | R2237X            | chr17:29665110  | 0.5714 | NM_000267    | casava |
| NF1    | 13H018 | R2616X            | chr17:29684326  | 0.5455 | NM_000267    | casava |
| NPM1   | 02H026 | L287fs (insTCTG)  | chr5:170837543  | 0.4162 | NM_002520    | casava |
| NPM1   | 06H074 | W288fs (ins CAGA) | chr5:170837547  | 0.412  | NM_002520    | casava |
| NRAS   | 11H140 | Y64D              | chr1:115256521  | 0.4776 | NM_002524    | kmer   |
| NRAS   | 12H170 | Q61H              | chr1:115256528  | 0.0753 | NM_002524    | kmer   |
| NRAS   | 05H180 | Q61H              | chr1:115256528  | 0.3292 | NM_002524    | kmer   |
| NRAS   | 04H101 | Q61R              | chr1:115256529  | 0.3051 | NM_002524    | kmer   |
| NRAS   | 12H055 | Q61K              | chr1:115256530  | 0.3464 | NM_002524    | kmer   |
| NRAS   | 09H045 | G13D              | chr1:115258744  | 0.4461 | NM_002524    | kmer   |
| NRAS   | 12H170 | G12D              | chr1:115258747  | 0.05   | NM_002524    | kmer   |
| NRAS   | 10H051 | G12V              | chr1:115258747  | 0.0596 | NM_002524    | kmer   |
| NRAS   | 11H145 | G12D              | chr1:115258747  | 0.0686 | NM_002524    | kmer   |
| NRAS   | 03H094 | G12S              | chr1:115258748  | 0.0669 | NM_002524    | kmer   |
| PTPN11 | 12H067 | G60V              | chr12:112888163 | 0.3742 | NM_002834    | kmer   |
| PTPN11 | 11H017 | G60V              | chr12:112888163 | 0.1391 | NM_002834    | kmer   |
| PTPN11 | 11H177 | E69K              | chr12:112888189 | 0.2018 | NM_002834    | kmer   |
| PTPN11 | 06H029 | A72T              | chr12:112888198 | 0.5011 | NM_002834    | kmer   |
| PTPN11 | 11H044 | S502P             | chr12:112926884 | 0.4058 | NM_002834    | casava |
| RUNX1  | 11H170 | R207W             | chr21:36206893  | 0.4    | NM_001754    | casava |
| RUNX1  | 12H106 | T181K             | chr21:36231842  | 0.4885 | NM_001754    | casava |
| RUNX1  | 05H180 | R166fsX           | chr21:36252864  | 0.4821 | NM_001754    | casava |
| RUNX1  | 08H022 | R162S             | chr21:36252876  | 0.5303 | NM_001754    | casava |
| RUNX1  | 11H170 | V130F             | chr21:36252974  | 0.5    | NM_001754    | casava |
| RUNX1  | 03H030 | K110Q             | chr21:36259163  | 0.9858 | NM_001754    | casava |
| RUNX1  | 11H140 | Q15fsX            | chr21:36421151  | 0.4771 | NM_001754    | casava |
| SETBP1 | 04H132 | T228fsX           | chr18:42456670  | 0.3488 | NM_001130110 | casava |
| SETBP1 | 09H057 | D868Y             | chr18:42531907  | 0.4932 | NM_015559    | casava |
| SMC1A  | 13H141 | R785P             | chrX:53430498   | 0.9057 | NM_001281463 | casava |
| SPI1   | 12H055 | R171H             | chr11:47377079  | 0.5027 | NM_003120    | casava |
| SRSF2  | 09H057 | P95H              | chr17:74732959  | 0.6141 | NM_003016    | kmer   |
| SRSF2  | 11H140 | P95L              | chr17:74732959  | 0.5151 | NM_003016    | kmer   |
| SRSF2  | 08H054 | P95H              | chr17:74732959  | 0.4683 | NM_003016    | kmer   |
| STAG2  | 11H140 | L566fsX           | chrX:123196809  | 0.1411 | NM_001042751 | casava |
| STAG2  | 03H030 | L571P             | chrX:123196825  | 0.8176 | NM_001042751 | casava |
| TET2   | 12H170 | G563fsX           | chr4:106156785  | 0.575  | NM_001127208 | casava |
| TET2   | 12H058 | E628X             | chr4:106156981  | 0.5045 | NM_001127208 | casava |
| TET2   | 07H038 | Q705X             | chr4:106157212  | 0.4236 | NM_001127208 | casava |
| TET2   | 11H140 | A991fsX           | chr4:106158069  | 0.4379 | NM_001127208 | casava |
| TET2   | 12H012 | L1258fsX          | chr4:106164905  | 0.3692 | NM_001127208 | casava |
| TET2   | 02H026 | C1273S            | chr4:106180789  | 0.5    | NM_001127208 | casava |
| TET2   | 12H067 | G1860fsX          | chr4:106197244  | 0.7419 | NM_001127208 | casava |
| U2AF1  | 11H132 | Q157P             | chr21:44514777  | 0.3876 | NM_006758    | kmer   |
| U2AF1  | 10H113 | R156H             | chr21:44514780  | 0.3608 | NM_006758    | kmer   |

|        |        |      |                |        |           |        |
|--------|--------|------|----------------|--------|-----------|--------|
| U2AF1  | 13H141 | S34F | chr21:44524456 | 0.4968 | NM_006758 | kmer   |
| U2AF1  | 10H078 | S34F | chr21:44524456 | 0.4759 | NM_006758 | kmer   |
| ZBTB7A | 03H028 | T29P | chr19:4055146  | 0.8537 | NM_015898 | casava |

**TABLE S4**

| Mutated gene        | p-value | Odds        |
|---------------------|---------|-------------|
| TP53                | 4.0E-31 | 56.62080152 |
| NPM1                | 1.8E-09 | 0.055403543 |
| FLT3                | 2.5E-09 | 0.10713596  |
| DNMT3A              | 0.004   | 0.34436868  |
| KIT                 | 0.008   | 0           |
| CALR                | 0.015   | 15.80128752 |
| WT1                 | 0.021   | 0           |
| NF1                 | 0.023   | 3.618548486 |
| IDH2                | 0.040   | 0.302616828 |
| ASXL1               | 0.063   | 0.262347861 |
| KRAS                | 0.064   | 0.177323639 |
| IDH1                | 0.065   | 0.170461615 |
| SETBP1              | 0.071   | 10.38924998 |
| JAK2                | 0.088   | 3.024684649 |
| GATA2               | 0.139   | 0           |
| BCOR                | 0.139   | 0           |
| CEBPA (biallelic)   | 0.140   | 0           |
| EVI1.r              | 0.229   | 0           |
| RAD21               | 0.366   | 0           |
| SF3B1               | 0.379   | 0           |
| TET2                | 0.445   | 0.666636145 |
| SRSF2               | 0.447   | 0.570485401 |
| U2AF1               | 0.498   | 1.60365777  |
| ZBTB7A              | 0.513   | 1.708820227 |
| SPI1                | 0.513   | 1.708820227 |
| STAG2               | 0.550   | 0.523800401 |
| KMT2A               | 0.581   | 1.296740197 |
| NRAS                | 0.590   | 0.760567794 |
| CREBBP              | 0.593   | 1.279026452 |
| ETV6                | 0.595   | 0           |
| SMC3                | 0.595   | 0           |
| ASXL2               | 0.605   | 0           |
| IKZF1               | 0.605   | 0           |
| KMT2C               | 0.623   | 1.719556397 |
| CBL                 | 0.623   | 1.719556397 |
| CSF3R               | 0.623   | 1.719556397 |
| RUNX1               | 0.675   | 0.722794981 |
| PTPN11              | 0.788   | 1.17192757  |
| ZRSR2               | 1.000   | 0           |
| PHF6                | 1.000   | 0           |
| KMT2D               | 1.000   | 0.633065818 |
| SMC1A               | 1.000   | 0.503653693 |
| CEBPA (monoallelic) | 1.000   | 0.503653693 |
| EZH2                | 1.000   | 1.021161766 |

TABLE S5

| Compound  | Compound name                                            | Company            | Catalog #              | Description                          |
|-----------|----------------------------------------------------------|--------------------|------------------------|--------------------------------------|
| UM0022485 | UM0022485 from UdeM                                      | UdeM               |                        |                                      |
| UM0042538 | Cytarabine                                               | TOCRIS             | 4520                   | Antimetabolite - pyrimidine analogue |
| UM0092374 | SPECS_AE-848/11419066                                    | SPECS              | AE-848/11419066        |                                      |
| UM0092376 | SPECS_AE-848/11419104                                    | SPECS              | AE-848/11419104        |                                      |
| UM0092618 | SPECS_AE-848/32006058                                    | SPECS              | AE-848/32006058        |                                      |
| UM0093235 | SPECS_AF-399/15335038                                    | SPECS              | AF-399/15335038        |                                      |
| UM0093450 | SPECS_AF-399/40684392                                    | SPECS              | AF-399/40684392        |                                      |
| UM0093569 | UM0093569 from UdeM                                      | UdeM               |                        |                                      |
| UM0093662 | SPECS_AF-399/40960315                                    | SPECS              | AF-399/40960315        |                                      |
| UM0093794 | SPECS_AG-205/07907018                                    | SPECS              | AG-205/07907018        |                                      |
| UM0093796 | SPECS_AG-205/07932038                                    | SPECS              | AG-205/07932038        |                                      |
|           | 1,2,2-trimethylpropyl 4-(2-ethoxyphenyl)-6-methyl-2-oxo- |                    |                        |                                      |
| UM0094058 | 1,2,3,4-tetrahydro-5-                                    | Chembridge         | 5612329                |                                      |
| UM0094107 | SPECS_AG-205/12013023                                    | SPECS              | AG-205/12013023        |                                      |
| UM0094890 | SPECS_AG-205/36915225                                    | SPECS              | AG-205/36915225        |                                      |
| UM0095749 | SPECS_AG-650/41069260                                    | SPECS              | AG-650/41069260        |                                      |
| UM0096165 | SPECS_AG-670/41019315                                    | SPECS              | AG-670/41019315        |                                      |
| UM0096176 | SPECS_AG-690/08355059                                    | SPECS              | AG-690/08355059        |                                      |
| UM0096705 | UM0096705 from UdeM                                      | UdeM               |                        |                                      |
| UM0096781 | UM0096781 from UdeM                                      | UdeM               |                        |                                      |
| UM0097793 | SPECS_AG-690/15441703                                    | SPECS              | AG-690/15441703        |                                      |
| UM0098860 | SPECS_AH-487/15276024                                    | SPECS              | AH-487/15276024        |                                      |
| UM0098937 | SPECS_AH-487/40669985                                    | SPECS              | AH-487/40669985        |                                      |
| UM0099317 | UM0099317 from UdeM                                      | UdeM               |                        |                                      |
| UM0099733 | SPECS_AK-777/37037051                                    | SPECS              | AK-777/37037051        |                                      |
| UM0099775 | SPECS_AK-778/11708035                                    | SPECS              | AK-778/11708035        |                                      |
| UM0100383 | SPECS_AK-968/11841778                                    | SPECS              | AK-968/11841778        |                                      |
|           | 1-(2-bromobenzyl)-4-(3,4,5-trimethoxybenzyl)piperazine   | Chembridge         | 5865602                |                                      |
| UM0101184 | SPECS_AK-968/15253444                                    | SPECS              | AK-968/15253444        |                                      |
| UM0101480 | SPECS_AK-968/15364033                                    | SPECS              | AK-968/15364033        |                                      |
| UM0101838 | SPECS_AK-968/37005200                                    | SPECS              | AK-968/37005200        |                                      |
| UM0101845 | SPECS_AK-968/37005263                                    | SPECS              | AK-968/37005263        |                                      |
| UM0101847 | SPECS_AK-968/37005284                                    | SPECS              | AK-968/37005284        |                                      |
| UM0102603 | SPECS_AK-968/41017746                                    | SPECS              | AK-968/41017746        |                                      |
| UM0102657 |                                                          | Chembridge         | 8803078                |                                      |
| UM0102836 | SPECS_AK-968/41022109                                    | SPECS              | AK-968/41022109        |                                      |
| UM0103032 | UM0103032 from UdeM                                      | UdeM               |                        |                                      |
| UM0103728 | SPECS_AM-807/14959586                                    | SPECS              | AM-807/14959586        |                                      |
| UM0104715 | SPECS_AN-648/40682639                                    | SPECS              | AN-648/40682639        |                                      |
| UM0104768 | SPECS_AN-648/40925375                                    | SPECS              | AN-648/40925375        |                                      |
| UM0105063 | SPECS_AN-698/40705204                                    | SPECS              | AN-698/40705204        |                                      |
| UM0105101 | SPECS_AN-698/40745478                                    | SPECS              | AN-698/40745478        |                                      |
|           | N-[4-(1,3-benzoxazol-2-yl)phenyl]cyclopropanecarboxamid  | Chembridge         | 7070640                |                                      |
| UM0105621 |                                                          |                    |                        |                                      |
| UM0105815 | SPECS_AN-988/40875350                                    | SPECS              | AN-988/40875350        |                                      |
| UM0106743 | UM0106743 from UdeM                                      | UdeM               |                        |                                      |
| UM0106805 | SPECS_AO-990/15068023                                    | SPECS              | AO-990/15068023        |                                      |
| UM0106825 | UM0106825 from UdeM                                      | UdeM               |                        |                                      |
| UM0107130 | SPECS_AP-906/41650452                                    | SPECS              | AP-906/41650452        |                                      |
| UM0107165 | UM0107165 from UdeM                                      | UdeM               | 20 mM stock, small vol |                                      |
| UM0118129 | Cloperastine hydrochloride                               | Santa Cruz Biotech | sc-234405              | Antihistaminic                       |
| UM0118172 | Sulfamethoxy pyridazine                                  | Sigma              | S7257                  | Antibacterial                        |
|           | Proadifen hydrochloride (SKF 525A (hydrochloride))       | Cayman chemical    | 15040                  | Cytochrome P (CYP)450 inhibitor      |
| UM0118177 |                                                          |                    |                        |                                      |
| UM0118216 | Dibucaine                                                | Santa Cruz Biotech | sc-252684              | Local anesthetic                     |
| UM0118223 | Simvastatin                                              | Abcam              | ab120505               | HMG-CoA reductase inhibitor          |
| UM0118262 | Etoposide                                                | TOCRIS             | 1226                   | DNA topoisomerase II inhibitor       |
| UM0118264 | Fenbendazole                                             | Sigma              | F5396                  | Antiparasitic                        |
| UM0118273 | Flunisolide                                              | Sigma              | F5021                  | Corticosteroid                       |
| UM0118279 | Flumethasone                                             | Sigma              | F9507                  | Corticosteroid                       |
| UM0118313 | Hydrocortisone base                                      | Sigma              | H4001                  | Cortisol                             |
| UM0118357 | N6-methyladenosine                                       | Selleckchem        | S3190                  | Base modified analogue of adenosine  |

|           |                                                       |                      |                  |                                                                 |
|-----------|-------------------------------------------------------|----------------------|------------------|-----------------------------------------------------------------|
| UM0118535 | Ifenprodil tartrate                                   | Santa Cruz Biotech   | SC-295173        | NMDA receptor antagonist                                        |
| UM0118582 | CLEMASTINE                                            | Cayman chemical      | 14637            | Antihistaminic and anticholinergic                              |
| UM0118601 | Betamethasone                                         | Santa Cruz Biotech   | SC-204647        | Glucocorticoid                                                  |
| UM0118604 | Amiodarone hydrochloride                              | Cayman chemical      | 15213            | class III antiarrhythmic agent                                  |
| UM0118623 | Cyclosporin A                                         | Cayman chemical      | 12088            | Immunosuppressant drug                                          |
| UM0118638 | Carbetapentane citrate                                | Santa Cruz Biotech   | SC-203538        | Non-opioid antitussive and anticonvulsant agent                 |
| UM0118693 | Terconazole                                           | Sigma                | SMB00286         | Antifungal agent                                                |
| UM0118717 | Budesonide                                            | Cayman chemical      | 15407            | Glucocorticoid                                                  |
| UM0118731 | Pentamidine isethionate                               | Santa Cruz Biotech   | sc-204176        | Antimicrobial                                                   |
| UM0118772 | Dacarbazine                                           | Sigma                | D2390            | Alkylating agent                                                |
| UM0118790 | Mometasone furoate                                    | Sigma                | M4074            | Glucocorticoid                                                  |
| UM0118805 | Azacytidine-5                                         | TOCRIS               | 3842             | DNA methyltransferase inhibitor                                 |
| UM0118859 | Raloxifene hydrochloride                              | Cayman chemical      | 10011620         | ER ligand                                                       |
| UM0118868 | Pramoxine hydrochloride                               | Santa Cruz Biotech   | sc-264141        | Topical anesthetic                                              |
| UM0118887 | Flurandrenolide                                       | Sigma                | F1642            | Corticosteroid                                                  |
| UM0118891 | Halcinonide                                           | Carbosynth           | FH23727          | Corticosteroid                                                  |
| UM0118901 | Atovaquone                                            | Sigma                | A7986            | Antiprotozoal and Antimalarial                                  |
| UM0118984 | Methiazole                                            | Accuratechemical     | TXL6214-100      | Antithyroid agent                                               |
| UM0118995 | S(-)Etidopride hydrochloride                          | Sigma                | E101             | D2 dopamine receptor antagonist                                 |
| UM0119063 | Methacycline hydrochloride                            | Selleck              | S2527            | Tetracycline antibiotic                                         |
| UM0119088 | Piperacetazine                                        | Sigma                | PH004722         | Antipsychotic drug                                              |
| UM0119104 | Ribavirin                                             | TOCRIS               | 4501             | Anti-viral drug                                                 |
| UM0119120 | Trifluridine                                          | Selleck              | S1778            | Anti-herpesvirus drug                                           |
| UM0119143 | ARTESUNATE                                            | Cayman chemical      | 11817            | Pro-drug anti-malaria                                           |
| UM0119195 | LAPACHONE, beta-                                      | Abcam                | ab141097         | Topoisomerase-inhibitor                                         |
| UM0119205 | PROSTAGLANDIN E2                                      | Cayman chemical      | 14010            | Active lipid compound (hormone-like effects)                    |
| UM0119219 | RAPAMYCIN                                             | Cayman chemical      | 13346            | IL-2 and mTOR Complex 1 inhibitor                               |
| UM0119222 | SHIKONIN                                              | Cayman chemical      | 14751            | Pyruvate kinase M2 inhibitor                                    |
| UM0119258 | DIACETYLKORSEVERILINE                                 | Affix Scientific     | AF3185           | Antiarrhythmic                                                  |
| UM0119268 | GENISTIN                                              | Cayman chemical      | 14174            | Phytoestrogen                                                   |
| UM0119334 | PATULIN                                               | Cayman chemical      | 11346            | Mycotoxin                                                       |
| UM0119434 | RUBESCENSIN A                                         | LKT Laboratories Inc | R8206            | Diterpene originally found in Rabdosia                          |
| UM0119467 | CHARTREUSIN                                           | LKT Laboratories Inc | C2803-5mg        | Antibiotic                                                      |
| UM0119502 | Aminopterin                                           | ENZO Life Sciences   | ALX-440-041-M050 | Dihydrofolate reductase inhibitor                               |
| UM0119612 | Bay 11-7085                                           | Cayman chemical      | 14795            | I $\kappa$ B $\alpha$ phosphorylation inhibitor (NF-kb pathway) |
| UM0119621 | Benztropine mesylate                                  | Sigma                | SML0847          | Muscarinic antagonist                                           |
| UM0119648 | Cyclophosphamide                                      | TOCRIS               | 4091             | Alkylating agent                                                |
| UM0119657 | (+)-Chlorpheniramine maleate                          | Sigma                | C3025            | H1 Histamine receptor antagonist                                |
| UM0119662 | Calmidazolium chloride                                | TOCRIS               | 2561             | Calmodulin antagonist                                           |
| UM0119682 | 7-Chloro-4-hydroxy-2-phenyl-1,8-naphthyridine         | Santa Cruz Biotech   | sc-300073        | Adenosine A1-R antagonist                                       |
| UM0119688 | Cantharidic Acid                                      | Abcam                | ab141725         | PP2A and PP1 inhibitor                                          |
| UM0119703 | 2',3'-dideohydro-3'-deoxythymidine 4'-Chloro-3-alpha- | Sigma                | D1413            | Nucleoside analogue. HIV replication inhibitor.                 |
| UM0119707 | (diphenylmethoxy)tropane                              |                      | 917              | Dopamine transporter inhibitor                                  |
| UM0119718 | Dihydroergotamine                                     | Santa Cruz Biotech   | sc-294343        | Serotonin antagonist and vasoconstrictor                        |
| UM0119800 | Eliprodiol                                            | Sigma                | E2031            | NMDA antagonist drug                                            |
| UM0119883 | hydroxyurea                                           | Sigma                | H8627            | Ribonucleotide reductase inhibitor. Antineoplastic              |
| UM0119908 | NSC 95397                                             | calbiochem           | 217694           | Cdc25 inhibitor                                                 |
| UM0119968 | L-687,384 hydrochloride                               | Sigma                | L8539-5MG        | $\alpha$ 1 receptor agonist                                     |
| UM0119978 | 6-Methyl-2-(phenylethynyl)pyridine                    |                      | M5435-5MG        | mGluR5 metabotropic glutamate receptor antagonist               |
| UM0119979 | 2-methoxyestradiol                                    | Sigma                | M6383-5MG        | Natural metabolite of estradiol                                 |
| UM0119998 | MG 624                                                | TOCRIS               | 1356             | $\alpha$ 7 nACh receptor antagonist                             |
| UM0120016 | L-745,870 hydrochloride                               | TOCRIS               | 1002             | D $_4$ dopamine receptor antagonist                             |
| UM0120130 | SU 6656                                               | Cayman chemical      | 13338            | Src kinases inhibitor                                           |
| UM0120205 | SKF 96365                                             | Cayman chemical      | 10009312         | SOCE inhibitor                                                  |
| UM0120206 | Salmeterol xinafoate                                  | Cayman chemical      | 16009            | $\beta$ -adrenergic agonist                                     |
| UM0120219 | DL-Stearoylcarnitine chloride                         | io Technology (Ced)  | S-126-5          |                                                                 |
| UM0120224 | SU 4312                                               | Enzo life sciences   | BML-EI306-0005   | VEGFR inhibitor                                                 |
| UM0120269 | Suramin hexasodium                                    | Enzo life sciences   | ALX-430-022-M050 | Purinergic receptor inhibitor                                   |
| UM0120298 | WAY-100635 maleate                                    | Cayman chemical      | 14599            | Serotonin 5-HT1A receptor antagonist                            |
| UM0120299 | YC-1                                                  | ENZO Life Sciences   | ALX-420-025-M005 | Guanylyl cyclase activator                                      |
| UM0120317 | (+)-trans-(1R,2R)-U-50488                             | Biotrend             | BN0526           | K opioid agonist                                                |
| UM0120474 | UM0120474 from UdeM                                   | UdeM                 |                  |                                                                 |
| UM0120482 | 6 $\alpha$ -METHYLPREDNISOLONE                        | Cayman chemical      | 11800            | Glucocorticoid                                                  |
| UM0120587 | methylmethane sulfonate                               | Sigma                | 129925-5G        | Alkylating agent                                                |
| UM0120625 | FORMESTANE                                            | Selleck              | S2208            | Aromatase inhibitor                                             |

|           |                                                        |                       |                |                                                                                         |
|-----------|--------------------------------------------------------|-----------------------|----------------|-----------------------------------------------------------------------------------------|
| UM0120639 | HOMIDIUM BROMIDE                                       | Sigma                 | E7637-1G       | DNA intercalating                                                                       |
| UM0120732 | UM0120732 from UdeM                                    | UdeM                  |                |                                                                                         |
| UM0120832 | CHOLEST-5-EN-3-ONE                                     | Sigma                 | C75004-500 mg  | Cholesterol metabolism                                                                  |
| UM0120854 | LANOSTEROL                                             | Sigma                 | L5768          | Cholesterol precursor sterol                                                            |
| UM0121014 | 5alpha-CHOLESTAN-3beta-OL-6-ONE (6-Ketocholestanol)    | Santa Cruz Biotech    | sc-210525A     | Oxygenated cholesterol compound                                                         |
| UM0121035 | 7-OXOCHOLESTEROL                                       | Sigma                 | C2394          | Cholesterol metabolism                                                                  |
| UM0121111 | alpha-MANGOSTIN                                        | Sigma                 | M3824-10 mg    | Antioxidant and anti-inflammatory                                                       |
| UM0121120 | COSMOSIIN HEXAACETATE:                                 | AvaChem Scientific    | 2905           | Flavonoid                                                                               |
| UM0121249 | AMINACRINE                                             | Selleck               | S4303          | Topical antiseptic                                                                      |
| UM0121301 | EZETIMIBE                                              | AdooQ Bioscience      | A10379         | Inhibitor of cholesterol absorption                                                     |
| UM0121349 | EDOXUDINE                                              | into Research Chem    | E915020        | Thymidine analogue                                                                      |
| UM0121357 | ESTRADIOL CYPIONATE                                    | Santa Cruz Biotech    | sc-234874      | Prodrug of estradiol                                                                    |
| UM0121415 | FLUMETHAZONE PIVALATE                                  | Sigma                 | F0891-100 mg   | Glucocorticoid receptor agonist                                                         |
| UM0121425 | DEXAMETHASONE                                          | Sigma                 | D4902-25MG     | Glucocorticoid                                                                          |
| UM0121443 | FLUDROCORTISONE ACETATE                                | AstaTech              | 35746          | Corticosteroid                                                                          |
| UM0121463 | BETAMETHASONE VALERATE                                 | AdooQ Bioscience      | A10131         | Glucocorticoid                                                                          |
| UM0121469 | HYDROXYPROGESTERONE                                    | Abcam                 | ab142640       | Synthetic progestational agent                                                          |
| UM0121477 | HYDROXYZINE PAMOATE                                    | Sigma                 | H9010-10G      | Antihistaminic                                                                          |
| UM0121509 | E-64-C                                                 | Cayman chemical       | 10007964       | Cystein protease inhibitor                                                              |
| UM0121517 | MYCOPHENOLIC ACID                                      | Abcam                 | ab120664       | Immunosuppressant                                                                       |
| UM0123617 | UM0123617 from UdeM                                    | UdeM                  |                |                                                                                         |
| UM0125497 | UM0125497 from UdeM                                    | UdeM                  |                |                                                                                         |
| UM0125633 | UM0125633 from UdeM                                    | UdeM                  |                |                                                                                         |
| UM0125695 | UM0125695 from UdeM                                    | UdeM                  |                |                                                                                         |
| UM0125748 | UM0125748 from UdeM                                    | UdeM                  |                |                                                                                         |
| UM0125807 | UM0125807 from UdeM                                    | UdeM                  |                |                                                                                         |
| UM0126171 | UM0126171 from UdeM                                    | UdeM                  |                |                                                                                         |
| UM0126248 | UM0126248 from UdeM                                    | UdeM                  |                |                                                                                         |
| UM0126615 | UM0126615 from UdeM                                    | UdeM                  |                |                                                                                         |
| UM0127622 | UM0127622 from UdeM                                    | UdeM                  |                |                                                                                         |
| UM0127808 | Triciribine AKT inhibitor V                            | Selleckchem.          | S1117          | Akt inhibitor                                                                           |
| UM0127831 | Ryuvidine                                              | Tocris                | 2609           | SETD8 and cdk4 inhibitor                                                                |
| UM0127846 | EGFR Inhibitor                                         | Calbiochem            | 324674-1MG     | EGFR Inhibitor                                                                          |
| UM0127851 | Fascaplysin, Synthetic                                 | AG Scientific         | F-1136         | Cdk4/D1 inhibitor                                                                       |
| UM0127854 | Flt-3 Inhibitor III                                    | calbiochem            | 343022-5MG     | FLT3 inhibitor                                                                          |
| UM0127866 | GTP-14564                                              | Tocris                | 2086           | Class III receptor tyrosine kinase inhibitor                                            |
| UM0127891 | MK2a Inhibitor                                         | Santa Cruz Biotech    | sc-203138      | MK2a Inhibitor                                                                          |
| UM0127902 | PKD1/Akt/Flt Dual Pathway                              | calbiochem            | 521275-5MG     | PKD1/Akt inhibitor                                                                      |
| UM0127927 | SU11652                                                | ENZO Life Sciences    | BML-EI408-0001 | VEGFR inhibitor                                                                         |
| UM0127943 | Dasatinib                                              | Adooq Bioscience      | A10290         | BCR/ABL and Src family tyrosine kinase inhibitor                                        |
| UM0127945 | Gefitinib                                              | Selleckchem.          | S1025          | EGFR Inhibitor                                                                          |
| UM0127950 | Sorafenib (Nexavar)                                    | Adooq Bioscience      | A10001-5       | Tyrosine protein kinase inhibitor                                                       |
| UM0127952 | Imatinib mesylate                                      | Adooq Bioscience      | A10468         | Tyrosine protein kinase inhibitor                                                       |
| UM0127955 | Mubritinib                                             | Selleckchem.          | S2216          | HER2/ErbB2 inhibitor                                                                    |
| UM0128550 | Vorinostat (SAHA)                                      | Adooq Bioscience      | A10979         | HDAC inhibitor                                                                          |
| UM0128557 | M-344                                                  | Cayman chemical       | 13174          | HDAC inhibitor                                                                          |
| UM0128576 | NSC-3852                                               | Santa Cruz Biotech    | sc-205773      | HDAC inhibitor                                                                          |
| UM0129937 | EPZ6438                                                | MedChem Express       | HY13803        | EZH2 inhibitor                                                                          |
| UM0129939 | UNC0646                                                |                       |                | G9a and GLP HMTases inhibitor                                                           |
| UM0130968 | Selumetinib/AZD6244                                    | Selleckchem.          | S1008          | MEK1 inhibitor                                                                          |
| UM0130977 | Trametinib                                             | Adooq Bioscience      | A11029         | MEK1 and MEK2 inhibitor<br>Immunomodulator, anti-inflammatory, anti-angiogenic activity |
| UM0130980 | Lenalidomide                                           | Adooq Bioscience      | A10522         | activity                                                                                |
| UM0130989 | Quizartinib (AC220)                                    | Adooq Bioscience      | A10027         | FLT3 inhibitor                                                                          |
| UM0131000 | FGF/VEGF Receptor Tyrosine Kinase Inhibitor (PD173074) | Santa Cruz Biotechnol | sc-202610A     | FGF and VEGF inhibitor                                                                  |
| UM0131001 | Ki8751                                                 | Adooq Bioscience      | A10502-10      | VEGFR-2 inhibitor                                                                       |
| UM0131002 | PDGFR Tyrosine Kinase Inhibitor                        | Calbiochem            | 521237-5MG     | PDGFR Tyrosine Kinase Inhibitor                                                         |
| UM0131006 | Flt3 Inhibitor IV                                      | Santa Cruz Biotechnol | sc-221615      | FLT3 inhibitor                                                                          |
| UM0131011 | c-Met/RON Dual Kinase Inhibitor                        | Calbiochem            | 448104-5MG     | c-Met/RON kinase inhibitor                                                              |
| UM0131110 | from UdeM                                              | UdeM                  |                |                                                                                         |
| UM0132260 | Pitavastatin                                           | UdeM                  |                | Statins                                                                                 |
| UM0132676 | Daunorubicin                                           | TOCRIS                | 1467           | Anthracycline - DNA intercalating                                                       |
| UM0133724 | 5FU                                                    | TOCRIS                | 3257           | Antimetabolite                                                                          |
| UM0133752 | All-trans retinoic acid (Vesanoid, Tretinoin)          | TOCRIS                | 695            | Endogenous agonist for retinoic acid receptors                                          |
| UM0134798 | Prednisolone                                           | Cayman chemical       | 15933          | Glucocorticoid                                                                          |

|           |                                                              |                  |                 |                                                 |
|-----------|--------------------------------------------------------------|------------------|-----------------|-------------------------------------------------|
| UM0135480 | Atorvastatin                                                 | Abcam            | ab141083        | Statins                                         |
| UM0135478 | Volasertib (BI6727)                                          | Selleckchem.     | S2235           | PLK1 inhibitor                                  |
| UM0135479 | Rigosertib (ON-01910)                                        | Selleckchem.     | S1362           | PLK1 inhibitor                                  |
| UM0135481 | Midostaurin (PKC412)                                         | Adooq Bioscience | A12650          | Protein kinase inhibitor                        |
| UM0135482 | EPZ5676                                                      | Adooq Bioscience | A12735          | DOT1L inhibitor                                 |
| UM0135483 | Bortezomid (Velcade)                                         | Adooq Bioscience | A10160          | Proteasome inhibitor                            |
| UM0135484 | Temsirolimus (CCI-779)                                       | Adooq Bioscience | A10906          | mTOR inhibitor                                  |
| UM0135485 | Tipifarnib                                                   | Adooq Bioscience | A10935          | Farnesyltransferase inhibitor                   |
| UM0135486 | AZD1152 (Barasertib)                                         | Adooq Bioscience | A10109          | Aurora B kinase inhibitor                       |
| UM0135487 | Alisertib (MLN8237)                                          | Adooq Bioscience | A10004          | Aurora A kinase inhibitor                       |
| UM0135488 | Vismodegib (RO5450815)                                       | Adooq Bioscience | A10258          | Hedgehog signalling pathway antagonist          |
| UM0135489 | MLN4924                                                      | Adooq Bioscience | A11260          | NAE inhibitor                                   |
| UM0135490 | AZD1208                                                      | Adooq Bioscience | A13203          | PIM kinase inhibitor                            |
| UM0135491 | 17-AAG (tanespimicin )                                       | Adooq Bioscience | A10010          | HSP90 inhibitor                                 |
| UM0135492 | STA-9090 (ganetespib)                                        | Adooq Bioscience | A11402          | HSP90 inhibitor                                 |
| UM0135493 | AZD-2014                                                     | Adooq Bioscience | A11303          | mTOR inhibitor                                  |
| UM0135494 | AZD-8055                                                     | Adooq Bioscience | A10114          | mTOR inhibitor                                  |
| UM0135495 | MK-2206, AKT inhibitor                                       | Adooq Bioscience | A10003          | Akt inhibitor                                   |
| UM0135496 | Alvocidib (flavopiridol)                                     | Adooq Bioscience | A10390          | Cdk9 kinase inhibitor                           |
| UM0135497 | ABT-199                                                      | Adooq Bioscience | A12500          | Bcl-2 inhibitor                                 |
| UM0135498 | Mitoxantrone                                                 | Cayman Chemicals | 14842           | Topoisomerase II inhibitor                      |
| UM0135499 | BET151 (GSK1210151A)                                         | ChemieTek        | I-BET151        | BET inhibitor for BRD2, BRD3 and BRD4           |
| UM0135500 | Voreloxin hydrochloride                                      | MedChem Express  | HY-16518        | Anthracenedione - Topoisomerase II inhibitor    |
| UM0135501 | SB590885                                                     | Selleckchem.     | S2220           | B-Raf inhibitor                                 |
| UM0135502 | Lonafarnib                                                   | Selleckchem.     | S2797           | Farnesyltransferase inhibitor                   |
| UM0135503 | Selinexor (KPT-330)                                          | Selleckchem.     | S7252           | CRM1 inhibitor                                  |
| UM0135504 | PF-3758309                                                   | Selleckchem.     | S7094           | PAK4 inhibitor                                  |
| UM0135505 | CPI-613                                                      | SIGMA            | SML0404         | $\alpha$ -ketoglutarate dehydrogenase inhibitor |
| UM0135506 | Arsenic trioxide (Trisenox, As <sub>2</sub> O <sub>3</sub> ) | SIGMA            | A1010           | Arsenic oxide                                   |
| UM0135507 | 6-Mercaptopurine                                             | TOCRIS           | 4103            | Antimetabolite - Purine analogue                |
| UM0135508 | Clofarabine                                                  | TOCRIS           | 2600            | Antimetabolite - Purine nucleoside              |
| UM0135509 | Temozolomide                                                 | TOCRIS           | 2706            | Alkylating agent                                |
| UM0135510 | Thioridazine hydrochloride                                   | TOCRIS           | 3070            | Dopamine receptor antagonist                    |
| UM0135511 | Panobinostat                                                 | Selleckchem.     | LBH589          | HDAC inhibitor                                  |
| UM0135578 | GSK126                                                       | ActiveBiochem    | A1275           | EZH2 inhibitor                                  |
| UM0135579 | UNC2400                                                      | TOCRIS           | 4905            | EZH2 inhibitor                                  |
| UM0135581 | UNC1999                                                      | TOCRIS           | 4904            | EZH1/2 inhibitor                                |
| UM0135583 | Fludarabine                                                  | TOCRIS           | 3495            | Antimetabolite - Purine analogue                |
| UM0135584 | Mitomycin C                                                  | Sigma            | 10107409001-2mg | Antibiotic                                      |
| UM0135585 | Topotecan hydrochloride hydrate                              | Sigma            | T2705-10MG      | Topoisomerase I-inhibitor                       |
| UM0135586 | gemcitabine                                                  | Selleckchem      | S1714-50mg      | Antimetabolite - Nucleoside analogue            |
| UM0135587 | Ruxolitinib                                                  | Selleckchem      | S1378-5mg       | JAK1/2 inhibitor                                |
| UM0135618 | UM0135618 from UdeM                                          | UdeM             |                 |                                                 |
| UM0135680 | UM0135680 from UdeM                                          | UdeM             |                 |                                                 |
| UM0135681 | Cerivastatin                                                 | UdeM             |                 | Statins                                         |



**TABLE S6**

| Group | BCLQ ID | Karyotype              | TP53    | RAS                    | JAK2  | FLT3          | age | sex | Status at sampling | FAB                              | WBC (x 10 <sup>9</sup> /L) | Tissue      | Blast % |
|-------|---------|------------------------|---------|------------------------|-------|---------------|-----|-----|--------------------|----------------------------------|----------------------------|-------------|---------|
| CK    | 03H030  | Complex                | WT      | WT* (Low NF1)          | V617F | WT            | 82  | F   | Diagnosis          | AML-M0                           | 34                         | Blood       | 60      |
| CK    | 03H090  | Complex                | WT      | WT                     | WT    | ITD           | 63  | F   | Diagnosis          | AML-M1                           | 109.7                      | Blood       | 90      |
| CK    | 03H094  | Complex                | Altered | NRAS G12S              | WT    | WT            | 56  | M   | Relapse            | AML-M1                           | 85.4                       | Blood       | 90      |
| CK    | 04H132  | Complex                | WT      | WT* (Low NF1)          | WT    | D835H (VAF8%) | 46  | M   | Diagnosis          | AML-M4                           | 161                        | Blood       | 48      |
| CK    | 05H180  | Complex                | WT      | NRAS Q61H              | WT    | WT            | 70  | M   | Diagnosis          | AML-M2                           | 200.8                      | Blood       | 35      |
| CK    | 06H004  | Complex                | Altered | WT* (Low NF1)          | WT    | WT            | 59  | F   | Diagnosis          | Not classifiable by FAB criteria | 321                        | Bone marrow | 44      |
| CK    | 06H016  | Complex                | WT      | WT* (Low NF1)          | WT    | WT            | 69  | F   | post-treatment     | AML-M5A                          | 48.4                       | Bone marrow | 87      |
| CK    | 07H038  | Complex                | WT      | BRAF R575K*            | WT    | WT            | 66  | M   | Diagnosis          | AML-M0                           | 9.2                        | Blood       | 90      |
| CK    | 07H148  | Complex                | Altered | WT                     | WT    | WT            | 68  | F   | Diagnosis          | AML-M2                           | 27                         | Bone marrow | 26      |
| CK    | 07H156  | Complex                | Altered | WT                     | WT    | ITD (VAF 11%) | 62  | M   | Diagnosis          | AML-M2                           | 49                         | Bone marrow | 44      |
| CK    | 09H054  | Complex                | WT      | WT                     | V617F | WT            | 54  | F   | Diagnosis          | Not classifiable by FAB criteria | 80.3                       | Blood       | 63      |
| CK    | 09H057  | Complex                | Altered | WT                     | WT    | WT            | 62  | M   | Diagnosis          | Not classifiable by FAB criteria | 31.4                       | Blood       | 60      |
| CK    | 09H078  | Complex                | Altered | WT                     | WT    | WT            | 58  | F   | Diagnosis          | AML-M1                           | 4.7                        | Bone marrow | 34      |
| CK    | 09H084  | Complex                | Altered | WT                     | WT    | WT            | 68  | F   | Diagnosis          | Not classifiable by FAB criteria | 48.7                       | Bone marrow | 40      |
| CK    | 09H085  | Complex                | WT      | WT                     | V617F | WT            | 72  | F   | Diagnosis          | AML-M7                           | 35.9                       | Blood       | 65      |
| CK    | 10H014  | Complex                | Altered | WT                     | WT    | WT            | 77  | M   | Diagnosis          | AML-M0                           | 1.3                        | Bone marrow | 72      |
| CK    | 10H034  | Complex                | WT      | WT                     | WT    | WT            | 65  | M   | Diagnosis          | AML-M2                           | 15.1                       | Blood       | 38      |
| CK    | 10H066  | Complex                | Altered | WT* (Low NF1)          | WT    | WT            | 54  | M   | Relapse            | AML-M6                           | 14.1                       | Blood       | 28      |
| CK    | 10H070  | Complex                | Altered | WT* (Low NF1)          | WT    | ITD           | 63  | F   | Relapse            | AML-M1                           | 20.4                       | Blood       | 95      |
| CK    | 10H087  | Complex                | Altered | WT                     | WT    | WT            | 73  | M   | Diagnosis          | AML-M1                           | 13.3                       | Blood       | 60      |
| CK    | 10H174  | Complex                | Altered | NF1 R2237X (Low NF1)   | WT    | WT            | 59  | F   | Diagnosis          | AML-M4                           | 112.7                      | Bone marrow | 70      |
| CK    | 11H002  | Complex                | Altered | WT                     | WT    | WT            | 65  | M   | post-treatment     | AML-M0                           | 18.1                       | Bone marrow | 80      |
| CK    | 11H017  | Complex                | WT      | KRAS G12D, PTPN11 G60V | WT    | WT            | 35  | M   | Diagnosis          | Not classifiable by FAB criteria | 20.3                       | Bone marrow | 56      |
| CK    | 11H170  | Complex                | WT      | WT                     | WT    | WT            | 51  | F   | Diagnosis          | AML-M0                           | 50.5                       | Blood       | 94      |
| CK    | 12H096  | Complex                | WT      | WT                     | WT    | WT            | 68  | F   | Diagnosis          | AML-M5                           | 28.4                       | Blood       | 66      |
| CK    | 12H106  | Complex                | Altered | WT                     | WT    | WT            | 67  | M   | Diagnosis          | Not classifiable by FAB criteria | 166.8                      | Blood       | 87      |
| CK    | 13H107  | Complex                | WT      | WT                     | WT    | WT            | 59  | M   | Relapse            | Not classifiable by FAB criteria | 11.7                       | Blood       | 70      |
| Inter | 03H033  | Normal Karyotype       | WT      | NRAS S17N              | WT    | ITD           | 47  | F   | Relapse            | AML-M1                           | 180.5                      | Blood       | 95      |
| Inter | 05H143  | Normal Karyotype       | WT      | NRAS G12D              | WT    | ITD           | 50  | M   | Relapse            | AML-M5A                          | 126.4                      | Blood       | 85      |
| Inter | 07H005  | Normal Karyotype       | WT      | WT                     | WT    | ITD           | 46  | F   | Diagnosis          | Not classifiable by FAB criteria | 64                         | Blood       | 85      |
| Inter | 07H112  | Normal Karyotype       | WT      | NRAS Q61H              | WT    | WT            | 49  | F   | Relapse            | AML-M1                           | 34.2                       | Blood       | 81      |
| Inter | 11H010  | Normal Karyotype       | WT      | WT                     | WT    | ITD           | 69  | F   | Relapse            | AML-M1                           | 127                        | Blood       | 95      |
| Inter | 11H046  | Normal Karyotype       | WT      | WT                     | V617F | WT            | 77  | M   | Diagnosis          | AML-M0                           | 48.8                       | Blood       | 80      |
| Inter | 11H095  | Normal Karyotype       | WT      | KRAS G12V              | WT    | WT            | 50  | M   | Diagnosis          | AML-M5A                          | 1.4                        | Bone marrow | 87      |
| Inter | 11H138  | Intermediate risk (abn | WT      | WT                     | WT    | ITD           | 71  | M   | Diagnosis          | AML-M0                           | 24                         | Bone marrow | 94      |
| Inter | 11H186  | Normal Karyotype       | WT      | WT                     | WT    | ITD           | 27  | F   | Relapse            | AML-M1                           | 53.3                       | Bone marrow | 82      |
| Inter | 12H195  | Normal Karyotype       | WT      | PTPN11 G603E           | WT    | ITD           | 57  | F   | Relapse            | AML-M4                           | 34.1                       | Blood       | 54      |
| Inter | 13H114  | Normal Karyotype       | WT      | WT                     | WT    | ITD           | 58  | M   | Diagnosis          | Not classifiable by FAB criteria | 68.4                       | Bone marrow | 83      |

**TABLE S7**

| Compound  | Compound name                                   | CK (log <sub>2</sub> (median IC <sub>50</sub> )) | Inter (log <sub>2</sub> (median IC <sub>50</sub> )) | p.value |
|-----------|-------------------------------------------------|--------------------------------------------------|-----------------------------------------------------|---------|
| UM0119502 | Aminopterin                                     | 2.00                                             | 2.00                                                | 0.38255 |
| UM0135586 | gemcitabine                                     | 2.00                                             | 2.00                                                | 0.19397 |
| UM0135498 | Mitoxantrone                                    | 2.34                                             | 2.00                                                | 0.01956 |
| UM0135511 | Panobinostat                                    | 2.60                                             | 2.00                                                | 0.01638 |
| UM0135483 | Bortezomid (Velcade)                            | 2.66                                             | 2.59                                                | 0.83005 |
| UM0135504 | PF-3758309                                      | 2.72                                             | 2.00                                                | 0.54986 |
| UM0135478 | Volasertib (BI6727)                             | 2.72                                             | 2.59                                                | 0.68806 |
| UM0132676 | Daunorubicin                                    | 2.79                                             | 2.00                                                | 0.00372 |
| UM0135479 | Rigosertib (ON-01910)                           | 3.09                                             | 5.84                                                | 0.00350 |
| UM0135492 | STA-9090 (ganetespib)                           | 3.11                                             | 2.58                                                | 0.01939 |
| UM0135508 | Clofarabine                                     | 3.26                                             | 2.27                                                | 0.00309 |
| UM0135585 | Topotecan hydrochloride hydrate                 | 3.52                                             | 2.00                                                | 0.03553 |
| UM0130977 | Trametinib                                      | 4.18                                             | 2.00                                                | 0.00864 |
| UM0135681 | Cerivastatin from chemists                      | 4.97                                             | 4.89                                                | 0.79674 |
| UM0135486 | AZD1152 (Barasertib)                            | 5.52                                             | 4.66                                                | 0.25991 |
| UM0042538 | Cytarabine                                      | 5.59                                             | 3.75                                                | 0.09737 |
| UM0135494 | AZD-8055                                        | 5.72                                             | 7.05                                                | 0.15201 |
| UM0135503 | Selinexor (KPT-330)                             | 6.01                                             | 5.61                                                | 0.25072 |
| UM0135507 | 6-Mercaptopurine                                | 6.14                                             | 6.72                                                | 0.37296 |
| UM0135584 | Mitomycin C                                     | 6.44                                             | 5.67                                                | 0.00244 |
| UM0135487 | Alisertib (MLN8237)                             | 6.73                                             | 6.44                                                | 0.94864 |
| UM0135496 | Alvocidib (flavopiridol)                        | 6.77                                             | 5.83                                                | 0.00000 |
| UM0127927 | SU11652                                         | 6.86                                             | 5.07                                                | 0.15669 |
| UM0135500 | Voreloxin hydrochloride                         | 7.02                                             | 5.69                                                | 0.00244 |
| UM0127846 | EGFR Inhibitor                                  | 7.13                                             | 7.54                                                | 0.14748 |
| UM0135489 | MLN4924                                         | 7.78                                             | 8.54                                                | 0.07647 |
| UM0135491 | 17-AAG (tanespimicin )                          | 7.97                                             | 7.43                                                | 0.09454 |
| UM0127943 | Dasatinib                                       | 7.98                                             | 5.41                                                | 0.25983 |
| UM0127851 | Fascaplysin, Synthetic                          | 8.00                                             | 8.01                                                | 0.65696 |
| UM0135493 | AZD-2014                                        | 8.01                                             | 8.52                                                | 0.22740 |
| UM0128576 | NSC-3852                                        | 8.06                                             | 7.39                                                | 0.10832 |
| UM0127854 | FIt-3 Inhibitor III                             | 8.25                                             | 7.98                                                | 0.82440 |
| UM0127808 | Triciribine AKT inhibitor V                     | 8.60                                             | 8.39                                                | 0.94946 |
| UM0118772 | Dacarbazine                                     | 8.62                                             | 8.97                                                | 0.29293 |
| UM0135481 | Midostaurin (PKC412)                            | 8.72                                             | 8.52                                                | 0.84917 |
| UM0132260 | Pitavastatin                                    | 8.72                                             | 8.15                                                | 0.25072 |
|           | 4'-Chloro-3- $\alpha$ -(diphenylmethoxy)tropane |                                                  |                                                     |         |
| UM0119707 | hydrochloride                                   | 8.87                                             | 9.99                                                | 0.10405 |
| UM0119998 | MG 624                                          | 9.05                                             | 8.14                                                | 0.46486 |
| UM0135583 | Fludarabine                                     | 9.06                                             | 7.93                                                | 0.00030 |
| UM0135587 | Ruxolitinib                                     | 9.06                                             | 8.94                                                | 0.38456 |
| UM0130989 | Quizartinib (AC220)                             | 9.06                                             | 6.93                                                | 0.05333 |
|           | 5 $\alpha$ -CHOLESTAN-3 $\beta$ -OL-6-ONE (6-   |                                                  |                                                     |         |
| UM0121014 | Ketocholestanol)                                | 9.15                                             | 9.64                                                | 0.11577 |
| UM0118262 | Etoposide                                       | 9.27                                             | 8.12                                                | 0.00442 |
| UM0127902 | PK1/Akt/FIt Dual Pathway Inhibitor              | 9.47                                             | 8.77                                                | 0.02704 |
| UM0119120 | Trifluridine                                    | 9.60                                             | 9.97                                                | 0.25983 |
| UM0128550 | Vorinostat (SAHA)                               | 9.61                                             | 8.83                                                | 0.07109 |

|           |                                                                        |       |       |         |
|-----------|------------------------------------------------------------------------|-------|-------|---------|
| UM0119219 | RAPAMYCIN                                                              | 9.66  | 13.29 | 0.26259 |
| UM0128557 | M-344                                                                  | 9.72  | 8.90  | 0.02262 |
| UM0121349 | EDOXUDINE                                                              | 9.76  | 10.28 | 0.41088 |
| UM0135499 | BET151 (GSK1210151A)                                                   | 9.80  | 10.15 | 0.67562 |
| UM0119222 | SHIKONIN                                                               | 10.03 | 9.66  | 0.58951 |
| UM0118264 | Fenbendazole                                                           | 10.08 | 10.22 | 0.10752 |
| UM0118859 | Raloxifene hydrochloride                                               | 10.25 | 11.97 | 0.10061 |
| UM0118535 | Ifenprodil tartrate                                                    | 10.33 | 10.69 | 0.07146 |
| UM0127831 | Ryuvidine                                                              | 10.41 | 10.00 | 0.03805 |
| UM0118984 | Methiazole                                                             | 10.44 | 11.04 | 0.00223 |
| UM0135480 | Atorvastatin                                                           | 10.45 | 9.58  | 0.09454 |
| UM0135618 | Statine From Chemist (Pf)                                              | 10.50 | 9.79  | 0.58417 |
| UM0131001 | Ki8751                                                                 | 10.50 | 9.33  | 0.24646 |
| UM0125497 | UM0125497 from UdeM                                                    | 10.56 | 11.12 | 0.20114 |
| UM0135502 | Lonafarnib                                                             | 10.59 | 10.72 | 0.64052 |
| UM0092374 | SPECS_AE-848/11419066                                                  | 10.61 | 10.60 | 0.79980 |
| UM0119662 | Calmidazolium chloride                                                 | 10.63 | 10.56 | 0.97472 |
| UM0121517 | MYCOPHENOLIC ACID                                                      | 10.68 | 10.44 | 0.19783 |
| UM0119979 | 2-methoxyestradiol                                                     | 10.69 | 11.45 | 0.00167 |
| UM0121249 | AMINACRINE                                                             | 10.71 | 10.76 | 0.92425 |
| UM0135484 | Temsirolimus (CCI-779)                                                 | 10.71 | 13.29 | 0.07669 |
| UM0121111 | alpha-MANGOSTIN                                                        | 10.75 | 10.92 | 0.44556 |
| UM0118623 | Cyclosporin A                                                          | 10.83 | 10.64 | 0.65696 |
| UM0119621 | Benzotropine mesylate                                                  | 10.86 | 12.10 | 0.03345 |
| UM0118693 | Terconazole                                                            | 10.86 | 11.41 | 0.01714 |
| UM0121477 | HYDROXYZINE PAMOATE                                                    | 10.87 | 12.18 | 0.17559 |
| UM0119688 | Cantharidic Acid                                                       | 10.95 | 10.82 | 0.63414 |
| UM0127891 | MK2a Inhibitor                                                         | 11.03 | 11.30 | 0.82170 |
| UM0120732 | UM0120732 from UdeM                                                    | 11.04 | 11.68 | 0.02951 |
| UM0129939 | UNC0646                                                                | 11.11 | 10.63 | 0.22499 |
| UM0118638 | Carbetapentane citrate                                                 | 11.12 | 11.96 | 0.14673 |
| UM0120219 | DL-Stearoylcarnitine chloride                                          | 11.13 | 12.69 | 0.01310 |
| UM0118582 | CLEMASTINE                                                             | 11.20 | 11.90 | 0.05546 |
| UM0119800 | Eliprodil                                                              | 11.21 | 13.05 | 0.07851 |
| UM0120130 | SU 6656                                                                | 11.26 | 11.23 | 0.84917 |
| UM0125807 | UM0125807 from UdeM                                                    | 11.27 | 11.70 | 0.42672 |
| UM0119968 | L-687,384 hydrochloride                                                | 11.29 | 12.32 | 0.05344 |
| UM0135506 | Arsenic trioxide (Trisenox, As2O3)                                     | 11.29 | 11.29 | 0.68822 |
| UM0127955 | Mubritinib                                                             | 11.37 | 7.63  | 0.06116 |
| UM0121035 | 7-OXOCHOLESTEROL                                                       | 11.38 | 10.36 | 0.64829 |
| UM0118731 | Pentamidine isethionate<br>FGF/VEGF Receptor Tyrosine Kinase Inhibitor | 11.40 | 11.66 | 0.20927 |
| UM0131000 | (PD173074)                                                             | 11.42 | 11.59 | 0.15893 |
| UM0119334 | PATULIN                                                                | 11.43 | 11.61 | 0.45909 |
| UM0120205 | SKF 96365                                                              | 11.52 | 12.49 | 0.00248 |
| UM0118805 | Azacytidine-5                                                          | 11.59 | 10.90 | 0.00685 |
| UM0120639 | HOMIDIUM BROMIDE                                                       | 11.59 | 12.00 | 0.82173 |
| UM0119088 | Piperacetazine                                                         | 11.68 | 12.15 | 0.13181 |
| UM0135495 | MK-2206, AKT inhibitor                                                 | 11.72 | 12.19 | 0.62886 |
| UM0118995 | S(-)Eticlopride hydrochloride                                          | 11.75 | 12.98 | 0.03622 |
| UM0133724 | 5FU                                                                    | 11.76 | 11.59 | 0.13869 |
| UM0127950 | Sorafenib (Nexavar)                                                    | 11.88 | 10.57 | 0.02951 |

|           |                                     |       |       |         |
|-----------|-------------------------------------|-------|-------|---------|
| UM0135581 | UNC1999                             | 11.92 | 11.24 | 0.02065 |
| UM0119682 | 7-Chloro-4-hydroxy-2-phenyl-1,8-    | 11.93 | 10.75 | 0.63765 |
| UM0135578 | GSK126                              | 11.96 | 11.91 | 0.65696 |
| UM0118177 | Proadifen hydrochloride (SKF 525A   | 11.98 | 13.14 | 0.10646 |
| UM0119143 | ARTESUNATE                          | 11.98 | 12.41 | 0.22104 |
| UM0120832 | CHOLEST-5-EN-3-ONE                  | 12.01 | 13.03 | 0.01643 |
| UM0119467 | CHARTREUSIN                         | 12.05 | 12.11 | 0.87201 |
| UM0126615 | UM0126615 from UdeM                 | 12.07 | 12.03 | 0.40833 |
| UM0135501 | SB590885                            | 12.07 | 11.73 | 0.07109 |
| UM0125633 | UM0125633 from UdeM                 | 12.09 | 12.09 | 0.58951 |
| UM0118357 | N6-methyladenosine                  | 12.09 | 13.19 | 0.25414 |
| UM0125695 | UM0125695 from UdeM                 | 12.18 | 12.86 | 0.18646 |
| UM0118604 | Amiodarone hydrochloride            | 12.19 | 12.70 | 0.03936 |
| UM0135510 | Thioridazine hydrochloride          | 12.35 | 12.75 | 0.02475 |
| UM0120016 | L-745,870 hydrochloride             | 12.36 | 13.29 | 0.11843 |
| UM0119258 | DIACETYLKORSEVERILINE               | 12.42 | 13.29 | 0.11843 |
| UM0096705 | UM0096705 from UdeM                 | 12.47 | 12.83 | 0.14673 |
| UM0121415 | FLUMETHAZONE PIVALATE               | 12.54 | 11.57 | 0.25868 |
| UM0135497 | ABT-199                             | 12.63 | 8.24  | 0.00311 |
| UM0120474 | UM0120474 from UdeM                 | 12.66 | 12.54 | 0.68687 |
| UM0022485 | UM0022485 from UdeM                 | 12.67 | 12.97 | 0.10523 |
| UM0135680 | Statine BMS 644950                  | 12.69 | 11.98 | 0.51121 |
| UM0118868 | Pramoxine hydrochloride             | 12.70 | 13.29 | 0.04064 |
| UM0119908 | NSC 95397                           | 12.76 | 11.87 | 0.23153 |
| UM0119195 | LAPACHONE, beta-                    | 12.79 | 11.56 | 0.10330 |
| UM0098937 | SPECS_AH-487/40669985               | 12.90 | 13.17 | 0.09585 |
| UM0120206 | Salmeterol xinafoate                | 12.91 | 13.13 | 0.36162 |
| UM0119612 | Bay 11-7085                         | 12.98 | 12.96 | 0.62696 |
| UM0092376 | SPECS_AE-848/11419104               | 13.01 | 13.03 | 0.83963 |
| UM0127866 | GTP-14564                           | 13.01 | 13.29 | 0.14773 |
| UM0118223 | Simvastatin                         | 13.01 | 11.96 | 0.43777 |
| UM0093450 | SPECS_AF-399/40684392               | 13.02 | 13.29 | 0.40293 |
| UM0093794 | SPECS_AG-205/07907018               | 13.04 | 13.29 | 0.01396 |
| UM0131006 | Flt3 Inhibitor IV                   | 13.12 | 11.28 | 0.00467 |
| UM0095749 | SPECS_AG-650/41069260               | 13.12 | 12.60 | 0.19084 |
| UM0121469 | HYDROXYPROGESTERONE CAPROATE        | 13.12 | 12.47 | 0.84548 |
| UM0126248 | UM0126248 from UdeM                 | 13.13 | 13.00 | 1.00000 |
| UM0120299 | YC-1                                | 13.13 | 8.67  | 0.00312 |
| UM0131002 | PDGFR Tyrosine Kinase Inhibitor VII | 13.15 | 13.29 | 0.06319 |
| UM0118216 | Dibucaine                           | 13.15 | 13.29 | 0.01875 |
| UM0126171 | UM0126171 from UdeM                 | 13.15 | 13.02 | 0.35132 |
| UM0119434 | RUBESCENSIN A                       | 13.16 | 12.51 | 0.25028 |
| UM0130968 | Selumetinib/AZD6244                 | 13.18 | 9.93  | 0.00281 |
| UM0107130 | SPECS_AP-906/41650452               | 13.22 | 13.29 | 0.14783 |
| UM0127945 | Gefitinib                           | 13.25 | 13.07 | 0.26618 |
| UM0093662 | SPECS_AF-399/40960315               | 13.28 | 13.29 | 0.11067 |
| UM0121357 | ESTRADIOL CYPIONATE                 | 13.29 | 13.29 | 0.09021 |
| UM0094890 | SPECS_AG-205/36915225               | 13.29 | 12.26 | 0.00497 |
| UM0101838 | SPECS_AK-968/37005200               | 13.29 | 13.29 | 0.38102 |
| UM0106805 | SPECS_AO-990/15068023               | 13.29 | 13.29 | 0.77422 |
| UM0118273 | Flunisolid                          | 13.29 | 13.29 | 0.28041 |
| UM0118279 | Flumethasone                        | 13.29 | 13.29 | 0.27792 |

|           |                                                                               |       |       |         |
|-----------|-------------------------------------------------------------------------------|-------|-------|---------|
| UM0118601 | Betamethasone                                                                 | 13.29 | 13.29 | 0.46718 |
| UM0118717 | Budesonide                                                                    | 13.29 | 13.29 | 0.74005 |
| UM0118790 | Mometasone furoate                                                            | 13.29 | 12.67 | 0.31496 |
| UM0118887 | Flurandrenolide                                                               | 13.29 | 13.29 | 0.55721 |
| UM0118891 | Halcinonide                                                                   | 13.29 | 13.29 | 0.65161 |
| UM0119205 | PROSTAGLANDIN E2                                                              | 13.29 | 13.29 | 0.88645 |
| UM0119657 | (+)-Chlorpheniramine maleate                                                  | 13.29 | 13.29 | 0.56174 |
| UM0119718 | Dihydroergotamine methanesulfonate                                            | 13.29 | 13.29 | 0.11214 |
| UM0121425 | DEXAMETHASONE                                                                 | 13.29 | 13.29 | 0.44212 |
| UM0121443 | FLUDROCORTISONE ACETATE                                                       | 13.29 | 13.29 | 0.92416 |
| UM0121463 | BETAMETHASONE VALERATE                                                        | 13.29 | 13.29 | 0.41784 |
| UM0127952 | Imatinib mesylate                                                             | 13.29 | 13.29 | 0.82908 |
| UM0130980 | Lenalidomide                                                                  | 13.29 | 13.29 | 0.47637 |
| UM0131011 | c-Met/RON Dual Kinase Inhibitor                                               | 13.29 | 13.02 | 0.00773 |
| UM0133752 | All-trans retinoic acid (Vesanoid, Tretinoin)                                 | 13.29 | 13.29 | 0.74784 |
| UM0135490 | AZD1208                                                                       | 13.29 | 12.01 | 0.75684 |
| UM0092618 | SPECS_AE-848/32006058                                                         | 13.29 | 13.29 | 0.02754 |
| UM0093235 | SPECS_AF-399/15335038                                                         | 13.29 | 13.29 | 0.50586 |
| UM0093569 | UM0093569 from UdeM                                                           | 13.29 | 13.29 | NA      |
| UM0093796 | SPECS_AG-205/07932038                                                         | 13.29 | 13.29 | 0.19397 |
| UM0094058 | 1,2,2-trimethylpropyl 4-(2-ethoxyphenyl)-6-methyl-2-oxo-1,2,3,4-tetrahydro-5- | 13.29 | 13.29 | 0.56047 |
| UM0094107 | SPECS_AG-205/12013023                                                         | 13.29 | 13.29 | 0.27084 |
| UM0096165 | SPECS_AG-670/41019315                                                         | 13.29 | 13.11 | 0.13820 |
| UM0096176 | SPECS_AG-690/08355059                                                         | 13.29 | 13.29 | 0.31752 |
| UM0096781 | UM0096781 from UdeM                                                           | 13.29 | 13.29 | 0.13912 |
| UM0097793 | SPECS_AG-690/15441703                                                         | 13.29 | 13.29 | 0.94513 |
| UM0098860 | SPECS_AH-487/15276024                                                         | 13.29 | 13.29 | 0.19397 |
| UM0099317 | UM0099317 from UdeM                                                           | 13.29 | 13.29 | 0.50586 |
| UM0099733 | SPECS_AK-777/37037051                                                         | 13.29 | 13.29 | 0.62199 |
| UM0099775 | SPECS_AK-778/11708035                                                         | 13.29 | 13.29 | 0.87443 |
| UM0100383 | SPECS_AK-968/11841778                                                         | 13.29 | 13.04 | 0.00043 |
| UM0101084 | 1-(2-bromobenzyl)-4-(3,4,5-trimethoxybenzyl)piperazine                        | 13.29 | 13.29 | 0.22669 |
| UM0101184 | SPECS_AK-968/15253444                                                         | 13.29 | 13.29 | 0.41723 |
| UM0101480 | SPECS_AK-968/15364033                                                         | 13.29 | 13.05 | 0.05709 |
| UM0101845 | SPECS_AK-968/37005263                                                         | 13.29 | 12.88 | 0.01150 |
| UM0101847 | SPECS_AK-968/37005284                                                         | 13.29 | 13.29 | 0.04612 |
| UM0102603 | SPECS_AK-968/41017746                                                         | 13.29 | 13.29 | 0.13912 |
| UM0102657 | UM0102657                                                                     | 13.29 | 13.29 | 0.02754 |
| UM0102836 | SPECS_AK-968/41022109                                                         | 13.29 | 13.29 | 0.56047 |
| UM0103032 | UM0103032 from UdeM                                                           | 13.29 | 13.29 | 0.13138 |
| UM0103728 | SPECS_AM-807/14959586                                                         | 13.29 | 13.29 | 0.68822 |
| UM0104715 | SPECS_AN-648/40682639                                                         | 13.29 | 13.29 | 0.13912 |
| UM0104768 | SPECS_AN-648/40925375                                                         | 13.29 | 13.29 | 0.18654 |
| UM0105063 | SPECS_AN-698/40705204                                                         | 13.29 | 13.29 | 0.07049 |
| UM0105101 | SPECS_AN-698/40745478                                                         | 13.29 | 13.29 | 0.56174 |
| UM0105621 | N-[4-(1,3-benzoxazol-2-yl)phenyl]cyclopropanecarboxamide                      | 13.29 | 13.29 | 0.38255 |
| UM0105815 | SPECS_AN-988/40875350                                                         | 13.29 | 13.29 | 0.19397 |
| UM0106743 | UM0106743 from UdeM                                                           | 13.29 | 13.29 | NA      |

|           |                                         |       |       |         |
|-----------|-----------------------------------------|-------|-------|---------|
| UM0106825 | UM0106825 from UdeM                     | 13.29 | 13.29 | 0.22280 |
| UM0107165 | UM0107165 from UdeM                     | 13.29 | 13.29 | NA      |
| UM0118129 | Cloperastine hydrochloride              | 13.29 | 13.29 | 0.03092 |
| UM0118172 | Sulfamethoxy pyridazine                 | 13.29 | 13.29 | NA      |
| UM0118313 | Hydrocortisone base                     | 13.29 | 13.29 | 0.74239 |
| UM0118901 | Atovaquone                              | 13.29 | 13.29 | NA      |
| UM0119063 | Methacycline hydrochloride              | 13.29 | 13.29 | NA      |
| UM0119104 | Ribavirin                               | 13.29 | 13.29 | 0.16869 |
| UM0119268 | GENISTIN                                | 13.29 | 13.29 | NA      |
| UM0119648 | Cyclophosphamide                        | 13.29 | 13.29 | NA      |
| UM0119703 | 2',3'-didehydro-3'-deoxythymidine       | 13.29 | 13.29 | 0.02754 |
| UM0119883 | hydroxyurea                             | 13.29 | 13.29 | NA      |
| UM0119978 | hydrochloride                           | 13.29 | 13.29 | NA      |
| UM0120224 | SU 4312                                 | 13.29 | 13.29 | 0.73772 |
| UM0120269 | Suramin hexasodium                      | 13.29 | 13.29 | NA      |
| UM0120298 | WAY-100635 maleate                      | 13.29 | 13.29 | 0.56174 |
| UM0120317 | (+)-trans-(1R,2R)-U-50488 hydrochloride | 13.29 | 13.29 | 0.01057 |
| UM0120482 | 6alpha-METHYLPREDNISOLONE ACETATE       | 13.29 | 13.29 | 0.96204 |
| UM0120587 | methylmethane sulfonate                 | 13.29 | 13.29 | NA      |
| UM0120625 | FORMESTANE                              | 13.29 | 13.29 | 0.19397 |
| UM0120854 | LANOSTEROL                              | 13.29 | 13.29 | 0.56174 |
| UM0121120 | COSMOSIIN HEXAACETATE: apigetrin        | 13.29 | 13.29 | NA      |
| UM0121301 | EZETIMIBE                               | 13.29 | 13.29 | NA      |
| UM0121509 | E-64-C                                  | 13.29 | 13.29 | NA      |
| UM0123617 | UM0123617 from UdeM                     | 13.29 | 13.29 | 0.66873 |
| UM0125748 | UM0125748 from UdeM                     | 13.29 | 13.29 | 0.38255 |
| UM0127622 | UM0127622 from UdeM                     | 13.29 | 13.29 | 0.56174 |
| UM0129937 | EPZ6438                                 | 13.29 | 13.29 | 0.08661 |
| UM0131110 | from UdeM                               | 13.29 | 13.29 | NA      |
| UM0134798 | Prednisolone                            | 13.29 | 13.29 | NA      |
| UM0135482 | EPZ5676                                 | 13.29 | 13.29 | NA      |
| UM0135485 | Tipifarnib                              | 13.29 | 13.29 | NA      |
| UM0135488 | Vismodegib (RO5450815)                  | 13.29 | 13.29 | 0.38255 |
| UM0135505 | CPI-613                                 | 13.29 | 13.29 | NA      |
| UM0135509 | Temozolomide                            | 13.29 | 13.29 | 0.50586 |
| UM0135579 | UNC2400                                 | 13.29 | 13.29 | 0.83785 |

**TABLE S8**

| Group | BCLQ ID | Karyotype        | TP53    | age | sex | Status at sampling | FAB                              | WBC (x 10 <sup>9</sup> /L) | Tissue      | Blast % |
|-------|---------|------------------|---------|-----|-----|--------------------|----------------------------------|----------------------------|-------------|---------|
| CK    | 03H094  | Complex          | Altered | 56  | M   | Relapse            | AML-M1                           | 85.4                       | Blood       | 90      |
| NK    | 04H112  | Normal Karyotype | WT      | 64  | F   | Diagnosis          | AML-M1                           | 361.2                      | Bone marrow | 91      |
| CK    | 05H180  | Complex          | WT      | 70  | M   | Diagnosis          | AML-M2                           | 200.8                      | Blood       | 35      |
| CK    | 06H004  | Complex          | Altered | 59  | F   | Diagnosis          | Not classifiable by FAB criteria | 321                        | Bone marrow | 44      |
| NK    | 06H133  | Normal Karyotype | WT      | 45  | F   | Diagnosis          | AML-M0                           | 11.9                       | Blood       | 60      |
| CK    | 07H038  | Complex          | WT      | 66  | M   | Diagnosis          | AML-M0                           | 9.2                        | Blood       | 90      |
| NK    | 07H134  | Normal Karyotype | WT      | 64  | M   | Diagnosis          | AML-M5                           | 53.1                       | Blood       | 81      |
| CK    | 07H156  | Complex          | Altered | 62  | M   | Diagnosis          | AML-M2                           | 49                         | Bone marrow | 44      |
| NK    | 08H104  | Normal Karyotype | WT      | 65  | M   | Diagnosis          | AML-M5B                          | 49.3                       | Bone marrow | 60      |
| NK    | 09H008  | Normal Karyotype | WT      | 67  | M   | Diagnosis          | AML-M5A                          | 65.4                       | Blood       | 58      |
| CK    | 09H084  | Complex          | Altered | 68  | F   | Diagnosis          | Not classifiable by FAB criteria | 48.7                       | Bone marrow | 40      |
| NK    | 09H111  | Normal Karyotype | WT      | 59  | F   | Diagnosis          | AML-M5B                          | 46.8                       | Blood       | 80      |
| CK    | 10H014  | Complex          | Altered | 77  | M   | Diagnosis          | AML-M0                           | 1.3                        | Bone marrow | 72      |
| NK    | 10H095  | Normal Karyotype | WT      | 65  | F   | Diagnosis          | AML-M1                           | 52                         | Blood       | 91      |
| NK    | 10H101  | Normal Karyotype | WT      | 49  | F   | Diagnosis          | AML-M2                           | 24.5                       | Bone marrow | 70      |
| NK    | 10H115  | Normal Karyotype | WT      | 43  | M   | Diagnosis          | AML-M1                           | 21.6                       | Bone marrow | 88      |
| NK    | 10H166  | Normal Karyotype | WT      | 63  | M   | Diagnosis          | Not classifiable by FAB criteria | 226.2                      | Blood       | 89      |
| CK    | 10H174  | Complex          | WT      | 59  | F   | Diagnosis          | AML-M4                           | 112.7                      | Bone marrow | 70      |
| CK    | 11H002  | Complex          | Altered | 65  | M   | post-treatment     | AML-M0                           | 18.1                       | Bone marrow | 80      |
| CK    | 11H017  | Complex          | WT      | 35  | M   | Diagnosis          | Not classifiable by FAB criteria | 20.3                       | Bone marrow | 56      |
| NK    | 11H151  | Normal Karyotype | WT      | 61  | M   | Diagnosis          | AML-M1                           | 53.3                       | Blood       | 78      |
| CK    | 11H170  | Complex          | WT      | 51  | F   | Diagnosis          | AML-M0                           | 50.5                       | Blood       | 94      |
| NK    | 12H007  | Normal Karyotype | WT      | 27  | F   | Diagnosis          | Not classifiable by FAB criteria | 67.2                       | Blood       | 71      |
| NK    | 12H056  | Normal Karyotype | WT      | 62  | M   | Diagnosis          | AML-M1                           | 48.7                       | Bone marrow | 89      |
| NK    | 12H124  | Normal Karyotype | WT      | 56  | F   | Diagnosis          | AML-M4                           | 49.6                       | Bone marrow | 85      |
| NK    | 12H171  | Normal Karyotype | WT      | 67  | F   | Diagnosis          | AML-M1                           | 86.7                       | Bone marrow | 95      |
| NK    | 13H073  | Normal Karyotype | WT      | 87  | F   | Diagnosis          | AML-M1                           | 357                        | Blood       | 97      |
| NK    | 14H007  | Normal Karyotype | WT      | 53  | F   | Diagnosis          | AML-M2                           | 85.7                       | Blood       | 80      |
| NK    | 14H019  | Normal Karyotype | WT      | 42  | M   | Diagnosis          | AML-M0                           | 19.5                       | Blood       | 96      |

**TABLE S9**

| Compound name        | CK (log <sub>2</sub> (median IC <sub>50</sub> )) | NK (log <sub>2</sub> (median IC <sub>50</sub> )) | p.value |
|----------------------|--------------------------------------------------|--------------------------------------------------|---------|
| Volasertib (BI6727)  | 2.14                                             | 3.12                                             | 0.03200 |
| GSK461363            | 1.38                                             | 2.55                                             | 0.00410 |
| Barasertib (AZD1152) | 3.79                                             | 3.62                                             | 0.24880 |



**TABLE S10**

|          |          |          |
|----------|----------|----------|
| ANLN     | EXO1     | RACGAP1  |
| ASF1B    | FANCI    | RAD51    |
| ASPM     | FEN1     | RAD51AP1 |
| AURKA    | FOXM1    | RAD54L   |
| AURKB    | GINS2    | RECQL4   |
| BIRC5    | GTSE1    | RNASEH2A |
| BRCA1    | HJURP    | RRM1     |
| BUB1     | HMMR     | RRM2     |
| BUB1B    | IQGAP3   | SGOL1    |
| C16orf59 | KIAA0101 | SKA1     |
| CASC5    | KIF11    | SKA3     |
| CCNA2    | KIF14    | SPAG5    |
| CCNB1    | KIF15    | SPC24    |
| CCNB2    | KIF18B   | SPC25    |
| CCNF     | KIF20A   | TCF19    |
| CDC20    | KIF23    | TICRR    |
| CDC25A   | KIF24    | TIMELESS |
| CDC25C   | KIF2C    | TK1      |
| CDC45    | KIF4A    | TOP2A    |
| CDC6     | KIFC1    | TPX2     |
| CDCA2    | MAD2L1   | TRIP13   |
| CDCA3    | MCM10    | TROAP    |
| CDCA5    | MCM4     | TTK      |
| CDCA8    | MCM6     | TYMS     |
| CDK1     | MELK     | UBE2C    |
| CDKN3    | MKI67    | UBE2T    |
| CENPA    | MND1     | WDR76    |
| CENPE    | MYBL2    | ZWINT    |
| CENPF    | NCAPG    |          |
| CENPM    | NCAPG2   |          |
| CEP55    | NCAPH    |          |
| CHAF1B   | NDC80    |          |
| CIT      | NEK2     |          |
| CKAP2L   | NUF2     |          |
| CKS1B    | NUSAP1   |          |
| CLSPN    | ORC1     |          |
| DEPDC1   | PCNA     |          |
| DEPDC1B  | PCNA-AS1 |          |
| DIAPH3   | PIF1     |          |
| DLGAP5   | PKMYT1   |          |
| DTL      | PLK1     |          |
| DTYMK    | POC1A    |          |
| E2F8     | POLA1    |          |
| ESCO2    | POLD1    |          |
| ESPL1    | POLQ     |          |

**TABLE S11**

| PROBE  | DESCRIPTION     | RANK IN GENE LIST | RANK METRIC SCORE | RUNNING ES  | CORE ENRICHMENT |
|--------|-----------------|-------------------|-------------------|-------------|-----------------|
| RAD23B | chr9:110045517  | 14                | 0.498664409       | 0.012954669 | Yes             |
| RAD21  | chr8:117858173  | 18                | 0.479830801       | 0.025850078 | Yes             |
| STIL   | chr1:47715811   | 48                | 0.443641663       | 0.036695898 | Yes             |
| DR1    | chr1:93811478   | 49                | 0.443492472       | 0.048728585 | Yes             |
| FBXO5  | chr6:153291658  | 79                | 0.424367726       | 0.05905147  | Yes             |
| NUP50  | chr22:45559726  | 83                | 0.420635849       | 0.07034082  | Yes             |
| E2F2   | chr1:23832920   | 104               | 0.409410626       | 0.08062749  | Yes             |
| CHEK1  | chr11:125495031 | 152               | 0.388893962       | 0.089248724 | Yes             |
| SETD8  | chr12:123868704 | 167               | 0.381161183       | 0.09901533  | Yes             |
| HIRA   | chr22:19318224  | 168               | 0.381023586       | 0.10935314  | Yes             |
| BARD1  | chr2:215590370  | 191               | 0.374302119       | 0.11860512  | Yes             |
| SQLE   | chr8:126010720  | 232               | 0.360137165       | 0.1267336   | Yes             |
| MKI67  | chr10:129894925 | 309               | 0.343486249       | 0.13293193  | Yes             |
| TOP1   | chr20:39657462  | 314               | 0.342222214       | 0.14205272  | Yes             |
| DBF4   | chr7:87505693   | 324               | 0.33934629        | 0.15089016  | Yes             |
| TFDP1  | chr13:114239003 | 343               | 0.335899621       | 0.15926449  | Yes             |
| KIF2C  | chr1:45205490   | 346               | 0.335070521       | 0.16827337  | Yes             |
| LBR    | chr1:225589204  | 366               | 0.331246972       | 0.1764804   | Yes             |
| KIF23  | chr15:69706585  | 396               | 0.326290995       | 0.18414229  | Yes             |
| PLK4   | chr4:128802016  | 415               | 0.323393017       | 0.1921773   | Yes             |
| CCNA2  | chr4:122737603  | 419               | 0.323093683       | 0.20082016  | Yes             |
| WRN    | chr8:30891232   | 423               | 0.322300851       | 0.20944153  | Yes             |
| KATNA1 | chr6:149916011  | 499               | 0.313977003       | 0.21488029  | Yes             |
| NEK2   | chr1:211831599  | 542               | 0.309326619       | 0.22154807  | Yes             |
| MAPK14 | chr6:35995454   | 544               | 0.309231073       | 0.22989695  | Yes             |
| POLE   | chr12:133200348 | 558               | 0.307950228       | 0.23771828  | Yes             |
| CDC25A | chr3:48198668   | 583               | 0.305311233       | 0.2450163   | Yes             |
| BIRC5  | chr17:76210277  | 590               | 0.304401547       | 0.25302884  | Yes             |
| CDC27  | chr17:45195311  | 674               | 0.296338588       | 0.2576605   | Yes             |
| CDKN3  | chr14:54863673  | 682               | 0.295534104       | 0.26539138  | Yes             |
| CKS2   | chr9:91926113   | 696               | 0.293662608       | 0.27282506  | Yes             |
| CCNB2  | chr15:59397284  | 742               | 0.289079279       | 0.2788203   | Yes             |
| TPX2   | chr20:30326904  | 766               | 0.287394881       | 0.28567326  | Yes             |
| CENPA  | chr2:27008882   | 788               | 0.285797715       | 0.29256505  | Yes             |
| AURKA  | chr20:54944445  | 789               | 0.285796136       | 0.30031916  | Yes             |
| BUB1   | chr2:111395275  | 865               | 0.280883998       | 0.3048601   | Yes             |
| CDC20  | chr1:43824626   | 867               | 0.280614138       | 0.31243253  | Yes             |
| CDK1   | chr10:62538089  | 873               | 0.280081183       | 0.31982628  | Yes             |
| KIF4A  | chrX:69509879   | 976               | 0.273531944       | 0.3230589   | Yes             |
| TTK    | chr6:80714322   | 1020              | 0.271434128       | 0.32865754  | Yes             |
| KIF11  | chr10:94352825  | 1050              | 0.270096391       | 0.33479476  | Yes             |
| ZAK    | chr2:173940565  | 1064              | 0.269180477       | 0.34156424  | Yes             |
| GSPT1  | chr16:11961985  | 1118              | 0.26517722        | 0.3465824   | Yes             |
| SLC7A1 | chr13:30083551  | 1126              | 0.264889151       | 0.35348186  | Yes             |
| PRC1   | chr15:91509268  | 1135              | 0.264270544       | 0.36032343  | Yes             |

|         |                 |      |             |            |     |
|---------|-----------------|------|-------------|------------|-----|
| RACGAP1 | chr12:50382945  | 1139 | 0.264040738 | 0.36736408 | Yes |
| EXO1    | chr1:242011493  | 1142 | 0.2638053   | 0.37443942 | Yes |
| CUL3    | chr2:225334867  | 1167 | 0.262283355 | 0.38057002 | Yes |
| HNRNPD  | chr4:83274467   | 1235 | 0.258606881 | 0.38483503 | Yes |
| ATF5    | chr19:50431959  | 1243 | 0.258177578 | 0.39155236 | Yes |
| CENPE   | chr4:104026963  | 1299 | 0.255135506 | 0.39621598 | Yes |
| TROAP   | chr12:49716971  | 1308 | 0.254667819 | 0.402797   | Yes |
| MCM6    | chr2:136597196  | 1351 | 0.252721697 | 0.40792897 | Yes |
| CENPF   | chr1:214776532  | 1376 | 0.251567692 | 0.41376886 | Yes |
| MYBL2   | chr20:42295659  | 1409 | 0.25008598  | 0.41924    | Yes |
| CCNF    | chr16:2479395   | 1418 | 0.249564424 | 0.42568254 | Yes |
| KIF20B  | chr10:91461347  | 1423 | 0.249383241 | 0.43228447 | Yes |
| CDC7    | chr1:91966404   | 1425 | 0.249317631 | 0.43900782 | Yes |
| NDC80   | chr18:2571510   | 1426 | 0.249310628 | 0.44577202 | Yes |
| CUL4A   | chr13:113863030 | 1461 | 0.247442901 | 0.45108932 | Yes |
| ESPL1   | chr12:53662083  | 1521 | 0.244142041 | 0.45529038 | Yes |
| ORC6    | chr16:46723558  | 1524 | 0.243713483 | 0.4618206  | Yes |
| SMC2    | chr9:106856541  | 1587 | 0.240492821 | 0.46579948 | Yes |
| H2AFX   | chr11:118964585 | 1640 | 0.237878308 | 0.47011808 | Yes |
| RAD54L  | chr1:46713367   | 1650 | 0.237305582 | 0.476187   | Yes |
| POLQ    | chr3:121150273  | 1767 | 0.231223226 | 0.47769678 | Yes |
| CDC6    | chr17:38444146  | 1867 | 0.226670891 | 0.4797812  | Yes |
| KIF22   | chr16:29802034  | 1899 | 0.225293159 | 0.48462072 | Yes |
| ODC1    | chr2:10580497   | 2013 | 0.221679926 | 0.48599482 | Yes |
| HMG2    | chr1:26798902   | 2053 | 0.22008726  | 0.49036455 | Yes |
| TOP2A   | chr17:38544773  | 2057 | 0.219919592 | 0.49620816 | Yes |
| PLK1    | chr16:23690201  | 2172 | 0.214143947 | 0.4973367  | Yes |
| DKC1    | chrX:153991017  | 2214 | 0.212507397 | 0.50141865 | Yes |
| CKS1B   | chr1:154947118  | 2216 | 0.212373599 | 0.5071396  | Yes |
| TRA2B   | chr3:185632358  | 2326 | 0.207913116 | 0.5083045  | Yes |
| PDS5B   | chr13:33160564  | 2387 | 0.205340207 | 0.5114117  | Yes |
| KIF5B   | chr10:32297938  | 2428 | 0.203552991 | 0.5152918  | Yes |
| ILF3    | chr19:10764937  | 2441 | 0.203156367 | 0.520311   | Yes |
| CDC25B  | chr20:3767419   | 2551 | 0.198451221 | 0.52121913 | Yes |
| CDC45   | chr22:19467349  | 2578 | 0.197342977 | 0.52550566 | Yes |
| SLC38A1 | chr12:46576840  | 2622 | 0.195635453 | 0.5290477  | Yes |
| PBK     | chr8:27667138   | 2685 | 0.193377331 | 0.53174824 | Yes |
| SYNCRIP | chr6:86317502   | 2741 | 0.191380873 | 0.5346821  | Yes |
| BRCA2   | chr13:32889617  | 2798 | 0.18952626  | 0.5375246  | Yes |
| MAD2L1  | chr4:120980579  | 2861 | 0.187314346 | 0.54006064 | Yes |
| NUSAP1  | chr15:41624892  | 2974 | 0.183655664 | 0.5404441  | Yes |
| KIF15   | chr3:44803209   | 2986 | 0.183409512 | 0.5449686  | Yes |
| MCM2    | chr3:127317200  | 3045 | 0.181034341 | 0.5474985  | Yes |
| CASC5   | chr15:40886447  | 3070 | 0.180507243 | 0.5514104  | Yes |
| CUL5    | chr11:107879408 | 3107 | 0.179295763 | 0.5547966  | Yes |
| KPNA2   | chr17:66031848  | 3153 | 0.177847579 | 0.55777395 | Yes |
| UBE2C   | chr20:44441215  | 3176 | 0.177110896 | 0.5616758  | Yes |
| NUP98   | chr11:3696240   | 3188 | 0.176802963 | 0.566021   | Yes |

|           |                 |      |             |            |     |
|-----------|-----------------|------|-------------|------------|-----|
| H2AFZ     | chr4:100869244  | 3205 | 0.17616348  | 0.5701436  | Yes |
| MTF2      | chr1:93544792   | 3271 | 0.174410343 | 0.5722063  | Yes |
| SUV39H1   | chrX:48553945   | 3276 | 0.174304619 | 0.5767712  | Yes |
| E2F4      | chr16:67226068  | 3388 | 0.171299458 | 0.57686055 | Yes |
| TACC3     | chr4:1723217    | 3473 | 0.169111222 | 0.57799923 | Yes |
| DDX39A    | chr19:14519610  | 3479 | 0.168821752 | 0.58237433 | Yes |
| EWSR1     | chr22:29663998  | 3485 | 0.168574378 | 0.5867427  | Yes |
| MCM5      | chr22:35796116  | 3545 | 0.167061046 | 0.58885247 | Yes |
| TMPO      | chr12:98909676  | 3558 | 0.166569158 | 0.59287894 | Yes |
| WHSC1     | chr4:1873123    | 3570 | 0.166112527 | 0.59693414 | Yes |
| CDK4      | chr12:58142027  | 3599 | 0.16525273  | 0.6002679  | Yes |
| RBL1      | chr20:35624755  | 3677 | 0.163072437 | 0.6015302  | Yes |
| CDKN2C    | chr1:51434367   | 3783 | 0.159927189 | 0.6015574  | Yes |
| SLC7A5    | chr16:87863629  | 3913 | 0.156300202 | 0.6005005  | Yes |
| CHAF1A    | chr19:4402660   | 4006 | 0.153998673 | 0.6009007  | Yes |
| CASP8AP2  | chr6:90539619   | 4228 | 0.148199841 | 0.595846   | Yes |
| HMMR      | chr5:162887517  | 4273 | 0.147401974 | 0.5980383  | Yes |
| HIST1H2BK | chr6:27106072   | 4449 | 0.142634347 | 0.5947217  | Yes |
| UPF1      | chr19:18942744  | 4478 | 0.14210926  | 0.5974275  | Yes |
| TNPO2     | chr19:12810008  | 4496 | 0.141786501 | 0.6005763  | Yes |
| HMGB3     | chrX:150151763  | 4508 | 0.141585618 | 0.603966   | Yes |
| STAG1     | chr3:136055999  | 4553 | 0.14038831  | 0.60596806 | Yes |
| BUB3      | chr10:124913760 | 4617 | 0.138524532 | 0.6071393  | Yes |
| PTTG1     | chr5:159848814  | 4672 | 0.137189448 | 0.6086439  | Yes |
| MARCKS    | chr6:114178527  | 4790 | 0.134742692 | 0.60749495 | Yes |
| SMAD3     | chr15:67358195  | 4885 | 0.132680312 | 0.6072346  | Yes |
| MCM3      | chr6:52128812   | 4898 | 0.132283792 | 0.6103309  | Yes |
| INCENP    | chr11:61891445  | 4966 | 0.130851448 | 0.6111297  | Yes |
| PRIM2     | chr6:57179603   | 5148 | 0.127234727 | 0.6071488  | Yes |
| MYC       | chr8:128748315  | 5201 | 0.126225367 | 0.6084381  | Yes |
| HN1       | chr17:73131338  | 5205 | 0.126162171 | 0.61173785 | Yes |
| PML       | chr15:74287014  | 5278 | 0.124809682 | 0.6121674  | Yes |
| NCL       | chr2:232319459  | 5613 | 0.11939837  | 0.6016908  | No  |
| NASP      | chr1:46049660   | 5712 | 0.117569014 | 0.6008562  | No  |
| DTYMK     | chr2:242615157  | 6040 | 0.112107359 | 0.59046924 | No  |
| SRSF2     | chr17:74730197  | 6041 | 0.112075992 | 0.59351003 | No  |
| YTHDC1    | chr4:69176105   | 6080 | 0.11133749  | 0.5949703  | No  |
| CDKN1B    | chr12:12870204  | 6197 | 0.109009065 | 0.5931642  | No  |
| EZH2      | chr7:148504464  | 6540 | 0.102793604 | 0.5819086  | No  |
| CCNT1     | chr12:49082241  | 6638 | 0.101110324 | 0.58066845 | No  |
| PAPD7     | chr5:6714718    | 6649 | 0.100924641 | 0.5829961  | No  |
| SNRPD1    | chr18:19192260  | 6657 | 0.100793317 | 0.5854433  | No  |
| SFPQ      | chr1:35649201   | 6723 | 0.099491604 | 0.58547336 | No  |
| PRPF4B    | chr6:4021569    | 7176 | 0.091467932 | 0.56939316 | No  |
| RPA2      | chr1:28218036   | 7381 | 0.088434733 | 0.5634151  | No  |
| EGF       | chr4:110834040  | 7387 | 0.088270143 | 0.5656047  | No  |
| HMGA1     | chr6:34204577   | 7398 | 0.08809714  | 0.5675842  | No  |
| GIN52     | chr16:85711280  | 7732 | 0.081555344 | 0.55612195 | No  |

|          |                 |       |              |            |    |
|----------|-----------------|-------|--------------|------------|----|
| SRSF1    | chr17:56078280  | 7744  | 0.081353232  | 0.5578775  | No |
| STMN1    | chr1:26210677   | 7970  | 0.0775567    | 0.55074185 | No |
| ATRX     | chrX:76760356   | 8063  | 0.076207526  | 0.54903144 | No |
| H2AFV    | chr7:44866488   | 8121  | 0.075085022  | 0.5487278  | No |
| ARID4A   | chr14:58765222  | 8143  | 0.074826799  | 0.54989564 | No |
| UBE2S    | chr19:55912650  | 8379  | 0.071411207  | 0.54218256 | No |
| FOXN3    | chr14:89622516  | 8402  | 0.071088009  | 0.5432079  | No |
| HIF1A    | chr14:62162119  | 8417  | 0.070707604  | 0.5445514  | No |
| SRSF10   | chr1:24292937   | 8499  | 0.069401518  | 0.543108   | No |
| MEIS2    | chr15:37183222  | 8597  | 0.06757459   | 0.540958   | No |
| CUL1     | chr7:148395933  | 8611  | 0.067247808  | 0.54224867 | No |
| SMC1A    | chrX:53401070   | 8642  | 0.066527873  | 0.5428217  | No |
| AMD1     | chr6:111135824  | 8747  | 0.065069258  | 0.5403163  | No |
| NOLC1    | chr10:103911933 | 9105  | 0.059199091  | 0.52726185 | No |
| TGFB1    | chr19:41836436  | 9256  | 0.056476615  | 0.52263427 | No |
| ODF2     | chr9:131217434  | 9635  | 0.049867582  | 0.5084643  | No |
| XPO1     | chr2:61705069   | 9852  | 0.046208397  | 0.5008477  | No |
| E2F1     | chr20:32263292  | 10318 | 0.038610935  | 0.48279956 | No |
| FANCC    | chr9:97861336   | 10392 | 0.037458491  | 0.48081803 | No |
| HSPA8    | chr11:122928200 | 10843 | 0.030803295  | 0.46317405 | No |
| DMD      | chrX:31137345   | 11222 | 0.024699189  | 0.4483212  | No |
| AURKB    | chr17:8108049   | 11463 | 0.020244537  | 0.4390146  | No |
| SMC4     | chr3:160117321  | 11525 | 0.019166417  | 0.4370296  | No |
| HNRNPU   | chr1:245013602  | 11829 | 0.013797833  | 0.42496094 | No |
| HOXC10   | chr12:54378946  | 11852 | 0.013349764  | 0.42441967 | No |
| CTCF     | chr16:67596310  | 13102 | -0.003928198 | 0.37323472 | No |
| TLE3     | chr15:70340130  | 13389 | -0.008595753 | 0.36172307 | No |
| POLA2    | chr11:65029432  | 13795 | -0.0154952   | 0.3455117  | No |
| ORC5     | chr7:103766788  | 13801 | -0.015582496 | 0.34572914 | No |
| TRAI     | chr3:49866028   | 13818 | -0.015806632 | 0.34550095 | No |
| CCND1    | chr11:69455873  | 13863 | -0.016523236 | 0.34414235 | No |
| MNAT1    | chr14:61201459  | 14072 | -0.020381425 | 0.3361536  | No |
| RBM14    | chr11:66391685  | 14359 | -0.025582083 | 0.32510278 | No |
| PURA     | chr5:139493708  | 14746 | -0.032205105 | 0.31012505 | No |
| KPNB1    | chr17:45727204  | 15239 | -0.041005403 | 0.2910331  | No |
| EFNA5    | chr5:106712590  | 15292 | -0.041837368 | 0.29003277 | No |
| SAP30    | chr4:174292093  | 15621 | -0.047528826 | 0.27785262 | No |
| PAFAH1B1 | chr17:2496923   | 16821 | -0.066044733 | 0.2304063  | No |
| BCL3     | chr19:45251978  | 17177 | -0.071992353 | 0.21778113 | No |
| PTTG3P   | chr8:67679632   | 17495 | -0.077517919 | 0.20686637 | No |
| E2F3     | chr6:20402137   | 17710 | -0.081362672 | 0.20028573 | No |
| MT2A     | chr16:56642478  | 17984 | -0.086962804 | 0.19143413 | No |
| CHMP1A   | chr16:89710839  | 18108 | -0.08910007  | 0.18880044 | No |
| PRMT5    | chr14:23389720  | 18505 | -0.096523166 | 0.17515711 | No |
| NOTCH2   | chr1:120454176  | 18562 | -0.097289257 | 0.17549703 | No |
| ABL1     | chr9:133589268  | 18982 | -0.105707981 | 0.16115837 | No |
| NUMA1    | chr11:71713910  | 19014 | -0.106414609 | 0.16277254 | No |
| SLC12A2  | chr5:127419483  | 19893 | -0.124427326 | 0.13009244 | No |

|         |                |       |              |             |    |
|---------|----------------|-------|--------------|-------------|----|
| SS18    | chr18:23596217 | 20112 | -0.129544497 | 0.12465479  | No |
| G3BP1   | chr5:151151476 | 20379 | -0.135751367 | 0.11741437  | No |
| CBX1    | chr17:46147414 | 21285 | -0.158427626 | 0.08454798  | No |
| RASAL2  | chr1:178063129 | 21432 | -0.162913382 | 0.082972445 | No |
| UCK2    | chr1:165796732 | 21605 | -0.168777943 | 0.0804883   | No |
| SMARCC1 | chr3:47627378  | 22659 | -0.211969376 | 0.04299681  | No |
| LMNB1   | chr5:126112315 | 22880 | -0.222582161 | 0.040001296 | No |
| LIG3    | chr17:33307517 | 23182 | -0.240849718 | 0.03417506  | No |
| RPS6KA5 | chr14:91337167 | 23187 | -0.241462439 | 0.04056207  | No |
| HUS1    | chr7:48002885  | 23666 | -0.280075163 | 0.028531393 | No |
| MEIS1   | chr2:66662532  | 23713 | -0.284913957 | 0.034372542 | No |

**TABLE S12**

| NAME                                       | SIZE | ES        | NES       | NOM p-val | FDR q-val | FWER p-val |
|--------------------------------------------|------|-----------|-----------|-----------|-----------|------------|
| HALLMARK_G2M_CHECKPOINT                    | 200  | 0.6121674 | 1.8908455 | 0.0289256 | 0.2105032 | 0.083      |
| HALLMARK_HEME_METABOLISM                   | 195  | 0.7044227 | 1.8302431 | 0.0208817 | 0.1563739 | 0.115      |
| HALLMARK_MITOTIC_SPINDLE                   | 198  | 0.4485225 | 1.7669445 | 0.0206612 | 0.1771456 | 0.179      |
| HALLMARK_E2F_TARGETS                       | 199  | 0.6491922 | 1.7437571 | 0.0573123 | 0.1605085 | 0.204      |
| HALLMARK_SPERMATOGENESIS                   | 132  | 0.3715057 | 1.6124326 | 0.0264706 | 0.2963762 | 0.366      |
| HALLMARK_TGF_BETA_SIGNALING                | 54   | 0.4770935 | 1.5842228 | 0.0345572 | 0.2917738 | 0.399      |
| HALLMARK_MTORC1_SIGNALING                  | 199  | 0.4408418 | 1.5679065 | 0.085595  | 0.2736438 | 0.415      |
| HALLMARK_ANDROGEN_RESPONSE                 | 100  | 0.3668789 | 1.5359592 | 0.0461894 | 0.2824619 | 0.456      |
| HALLMARK_UV_RESPONSE_UP                    | 154  | 0.3780139 | 1.5171224 | 0.0397196 | 0.2768447 | 0.482      |
| HALLMARK_PROTEIN_SECRETION                 | 96   | 0.4204671 | 1.5089183 | 0.0890269 | 0.2615056 | 0.494      |
| HALLMARK_ESTROGEN_RESPONSE_LATE            | 199  | 0.3167692 | 1.4279634 | 0.0422535 | 0.3399994 | 0.588      |
| HALLMARK_UNFOLDED_PROTEIN_RESPONSE         | 111  | 0.3966712 | 1.3960732 | 0.1666667 | 0.3590883 | 0.629      |
| HALLMARK_CHOLESTEROL_HOMEOSTASIS           | 73   | 0.3746498 | 1.378727  | 0.1369565 | 0.3553841 | 0.641      |
| HALLMARK_ESTROGEN_RESPONSE_EARLY           | 200  | 0.274007  | 1.2952799 | 0.0903614 | 0.4518961 | 0.714      |
| HALLMARK_KRAS_SIGNALING_UP                 | 199  | 0.2761497 | 1.2794061 | 0.1089385 | 0.4511978 | 0.738      |
| HALLMARK_APICAL_JUNCTION                   | 200  | 0.2935889 | 1.261466  | 0.1984334 | 0.4549179 | 0.756      |
| HALLMARK_PI3K_AKT_MTOR_SIGNALING           | 105  | 0.3094397 | 1.2539423 | 0.1865828 | 0.441902  | 0.764      |
| HALLMARK_APICAL_SURFACE                    | 44   | 0.3261834 | 1.2441347 | 0.1636364 | 0.4328205 | 0.77       |
| HALLMARK_HYPOXIA                           | 198  | 0.2795842 | 1.2246623 | 0.1690821 | 0.4377699 | 0.785      |
| HALLMARK_MYOGENESIS                        | 200  | 0.2844958 | 1.2199533 | 0.2022792 | 0.422154  | 0.787      |
| HALLMARK_MYC_TARGETS_V1                    | 198  | 0.4348958 | 1.200578  | 0.3440644 | 0.4267269 | 0.8        |
| HALLMARK_ANGIOGENESIS                      | 36   | 0.3418521 | 1.1762993 | 0.2599469 | 0.4448198 | 0.829      |
| HALLMARK_IL2_STAT5_SIGNALING               | 199  | 0.2586088 | 1.1310636 | 0.2702079 | 0.4957219 | 0.863      |
| HALLMARK_NOTCH_SIGNALING                   | 32   | 0.3250612 | 1.118593  | 0.300216  | 0.4954515 | 0.875      |
| HALLMARK_INTERFERON_ALPHA_RESPONSE         | 93   | 0.3885633 | 1.1053783 | 0.4037267 | 0.4937779 | 0.877      |
| HALLMARK_EPITHELIAL_MESENCHYMAL_TRANSITION | 199  | 0.2742646 | 1.0998935 | 0.3002755 | 0.483378  | 0.879      |
| HALLMARK_UV_RESPONSE_DN                    | 144  | 0.2445228 | 1.0728748 | 0.3037037 | 0.5055693 | 0.893      |
| HALLMARK_P53_PATHWAY                       | 200  | 0.2289003 | 1.0503923 | 0.3517699 | 0.5220799 | 0.91       |
| HALLMARK_BILE_ACID_METABOLISM              | 112  | 0.2387155 | 1.0415002 | 0.369898  | 0.5183294 | 0.912      |
| HALLMARK_COMPLEMENT                        | 196  | 0.273164  | 1.0388726 | 0.3795309 | 0.505139  | 0.914      |
| HALLMARK_REACTIVE_OXIGEN_SPECIES_PATHWAY   | 47   | 0.3014832 | 0.9670534 | 0.5073375 | 0.6019142 | 0.948      |
| HALLMARK_MYC_TARGETS_V2                    | 58   | 0.3643124 | 0.9611996 | 0.513347  | 0.592642  | 0.949      |
| HALLMARK_XENOBIOTIC_METABOLISM             | 199  | 0.2179418 | 0.957076  | 0.5165877 | 0.5809904 | 0.95       |
| HALLMARK_DNA_REPAIR                        | 142  | 0.2806273 | 0.9268932 | 0.5174538 | 0.6171175 | 0.958      |
| HALLMARK_APOPTOSIS                         | 160  | 0.2196675 | 0.9168644 | 0.5604396 | 0.6152847 | 0.958      |
| HALLMARK_KRAS_SIGNALING_DN                 | 195  | 0.1848015 | 0.873707  | 0.662069  | 0.6759427 | 0.97       |
| HALLMARK_INFLAMMATORY_RESPONSE             | 199  | 0.2390811 | 0.8639299 | 0.5920177 | 0.6741296 | 0.972      |
| HALLMARK_PANCREAS_BETA_CELLS               | 38   | 0.2188565 | 0.8288609 | 0.7175793 | 0.718412  | 0.979      |
| HALLMARK_INTERFERON_GAMMA_RESPONSE         | 191  | 0.2525077 | 0.8150839 | 0.6126316 | 0.7234674 | 0.981      |
| HALLMARK_GLYCOLYSIS                        | 198  | 0.2045166 | 0.7977095 | 0.6734234 | 0.735598  | 0.984      |
| HALLMARK_IL6_JAK_STAT3_SIGNALING           | 87   | 0.219329  | 0.7753686 | 0.7209821 | 0.7576115 | 0.988      |
| HALLMARK_COAGULATION                       | 135  | 0.191924  | 0.7752474 | 0.7931937 | 0.7397857 | 0.988      |
| HALLMARK_HEDGEHOG_SIGNALING                | 35   | 0.1941572 | 0.6944626 | 0.9033149 | 0.8372076 | 0.996      |
| HALLMARK_ADIPOGENESIS                      | 196  | 0.1748055 | 0.6209213 | 0.8636364 | 0.8970113 | 0.998      |
| HALLMARK_TNFA_SIGNALING_VIA_NFKB           | 199  | 0.1508638 | 0.4476964 | 0.9561586 | 0.9697406 | 0.998      |

## SUPPLEMENTAL FIGURES

### Figure S1

(A) Survival in CK AML with and without *TP53* alterations. (B) Aberrant splicing resulting from a splice site mutation. Integrative Genomics Viewer (IGV) captions of sample 11H002 (left panel), carrying a T125T synonymous splice-site mutation and sample 09H084 (middle panel), a representative sample with CK without this mutation. Ratios of average counts for the 21 first kmers in intron 4 over average counts for the 21 last kmers of exon 4 (excluding the one including mutated position), showing unique intron retention in sample with T125T mutation (right panel). (C) Genomic and complementary DNA Sanger sequences for cases with discordance in variant allele frequency (VAF) between RNA and DNA. Sample 08H033 cDNA could not successfully be sequenced, but VAF derived from RNA-sequencing was estimated at 100%. *TP53* mutations VAF are detailed in Table S2. (D) *TP53* expression in CK and non-CK AML. (E) *TP53* isoform expression in non-CK AML. p-value derived from Wilcoxon test. p-value calculated using Log-Rank test. Medians are represented by a black line in dot plots.

### Figure S2

(A) Significance of compound activity based on the status of all mutations recurring in at least 3 samples included in the screen. Response of most active compounds in *JAK2* mutated samples (B) and *RAS* altered samples (C). Only 2 samples were characterized by *FLT3* mutations in the main leukemia clone, therefore the impact of this mutation, which is rare in CK AML, could not be assessed.

### Figure S3

(A) Differential analysis of cell cycle genes (GO:0007049) and *MKI67* expression in our AML samples dependent of their tissue provenance: bone marrow (BM) or peripheral blood. (B) *PLK1* and *MKI67* mRNA expression in BM and blood specimens. CK samples are depicted in red, non-CK in grey (upper panel). Within each subgroup of tissue source, *PLK1* and *MKI67* expression is compared between CK and non-CK AML (lower panel). Medians are represented by a black line.

### Figure S4

(A) Mouse weight followed over time in vehicle, cytarabine and volasertib treated mice after transplantation with HL-60 leukemic cells (n=6 for each condition). (B) Mouse weight followed over time in vehicle, cytarabine and volasertib treated mice after transplantation with 09H046 AML cells (n=6 for each condition).



**Figure S1**

**A**

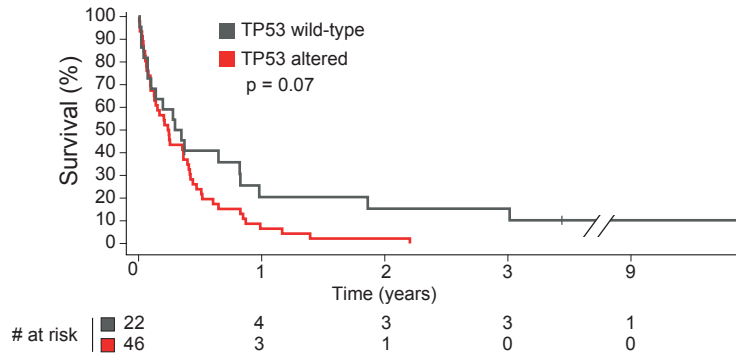

**B**

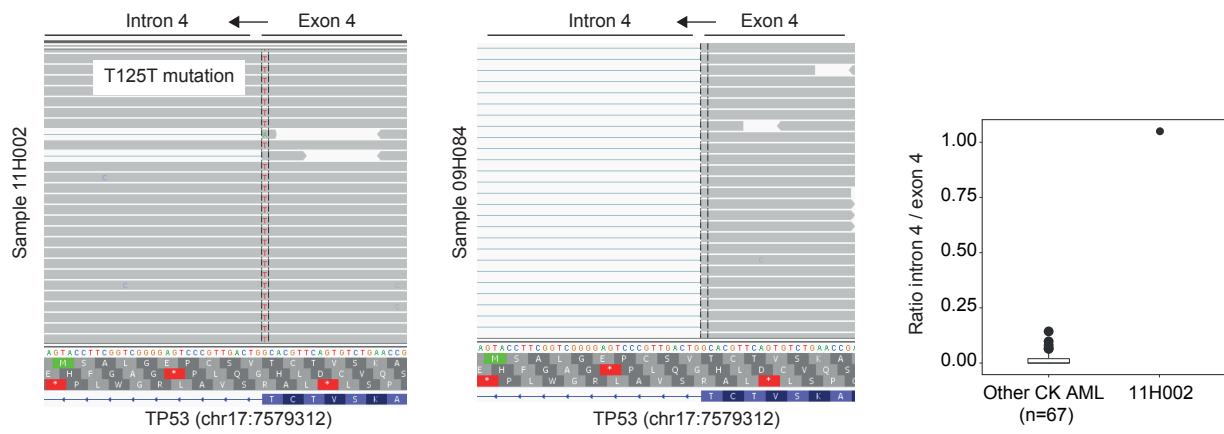

**C**

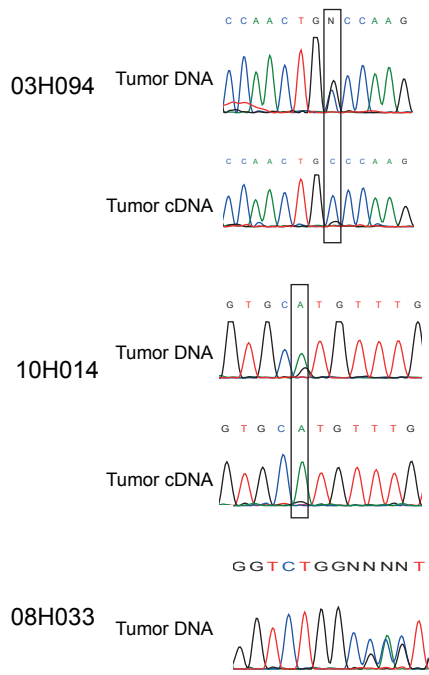

**D**

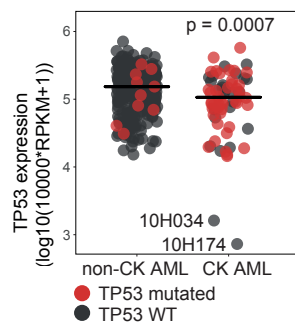

**E**

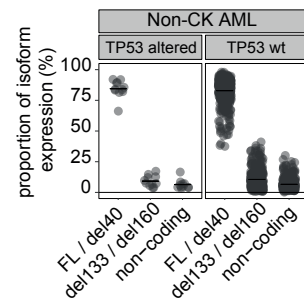

**Figure S2**

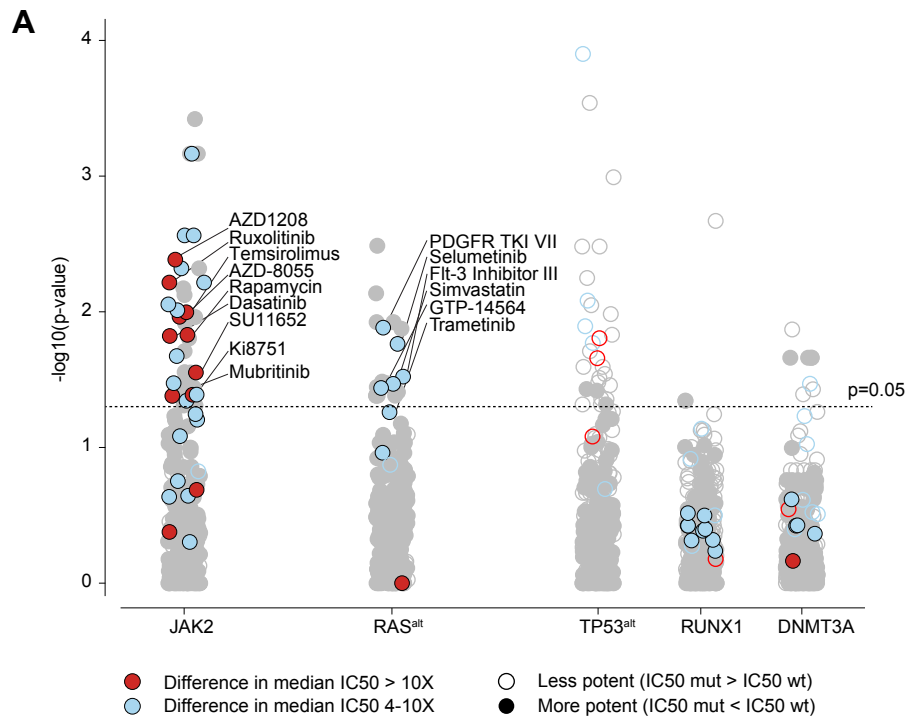

**B**

| Compound     | Target           | p-value | Median IC <sub>50</sub> JAK2 <sup>mut</sup> (nM) | Median IC <sub>50</sub> JAK2 <sup>wt</sup> (nM) |
|--------------|------------------|---------|--------------------------------------------------|-------------------------------------------------|
| AZD-1208     | pim kinase       | 0.004   | 150                                              | >10000                                          |
| Ruxolitinib  | JAK1/2           | 0.006   | 64                                               | 664                                             |
| Temsirolimus | mTOR             | 0.010   | 10                                               | 3614                                            |
| AZD-8055     | mTOR             | 0.011   | 6                                                | 62                                              |
| Rapamycin    | mTOR             | 0.015   | <4                                               | >10000                                          |
| Dasatinib    | tyrosine kinases | 0.015   | <4                                               | 321                                             |
| SU11652      | tyrosine kinases | 0.028   | 10                                               | 145                                             |
| Ki8751       | VEGFR2           | 0.041   | 130                                              | 1705                                            |
| Mubritinib   | Her2             | 0.042   | 153                                              | 5159                                            |

**C**

| Compound            | Target            | p-value | Median IC <sub>50</sub> RAS <sup>alt</sup> (nM) | Median IC <sub>50</sub> RAS <sup>wt</sup> (nM) |
|---------------------|-------------------|---------|-------------------------------------------------|------------------------------------------------|
| PDGFR TKI VII       | PDGFR             | 0.013   | 2427                                            | >10000                                         |
| Selumetinib         | MEK1              | 0.017   | 2117                                            | >10000                                         |
| Flt-3 inhibitor III | FLT3              | 0.030   | 105                                             | 424                                            |
| Simvastatin         | HMG-CoA reductase | 0.034   | 1134                                            | 9506                                           |
| GTP-14564           | tyrosine kinases  | 0.036   | 2021                                            | >10000                                         |
| Trametinib          | MEK1/2            | 0.055   | 5                                               | 37                                             |

**Figure S3**

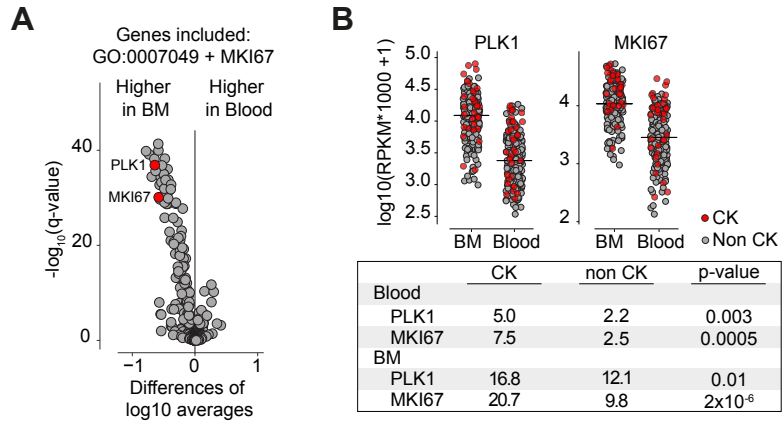

**Figure S4**

**A**

**HL-60 cell line:**

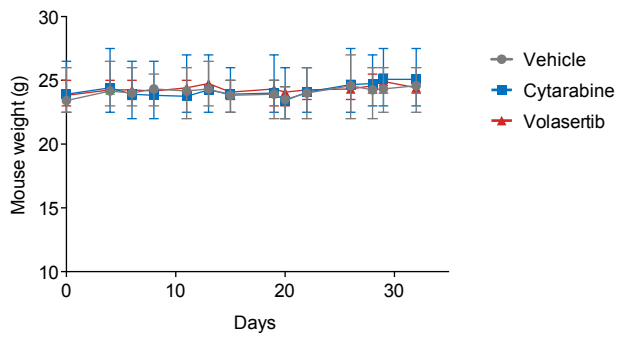

**B**

**09H046 primary human AML:**

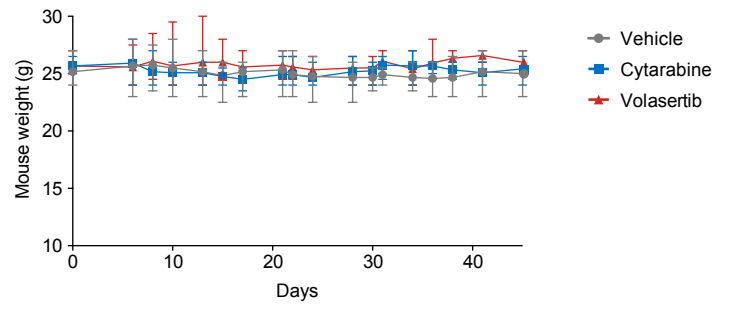

Supplement: ba028480-suppl1.pdf [file ba028480-suppl1.pdf]
